# Extreme genomic volatility characterises the evolution of the immunoglobulin heavy chain locus in teleost fishes

William J. Bradshaw<sup>1,2</sup> and Dario Riccardo Valenzano<sup>1,2,\*</sup>

<sup>1</sup>Max Planck Institute for Biology of Ageing, Joseph-Stelzmann-Str. 296, 50937 Cologne, Germany

<sup>2</sup>CECAD Research Center, University of Cologne, Joseph-Stelzmann-Str. 26, 50937 Cologne, Germany

\*To whom correspondence should be addressed. E-mail: [dvalenzano@age.mpg.de](mailto:dvalenzano@age.mpg.de)

## Abstract

The evolution of the adaptive immune system has provided vertebrates with a uniquely sophisticated immune toolkit, enabling them to mount precise immune responses against a staggeringly diverse range of antigens. Like other vertebrates, teleost fishes possess a complex and functional adaptive immune system; however, our knowledge of the complex antigen-receptor genes underlying its functionality has been restricted to a small number of experimental and agricultural species, preventing a systematic investigation of how these crucial gene loci evolve. Here, we analyse the genomic structure of the immunoglobulin heavy chain (*IGH*) gene loci in the cyprinodontiforms, a diverse and important group of teleosts present in many different habitats across the world. We reconstruct the complete *IGH* loci of the turquoise killifish (*Nothobranchius furzeri*) and the southern platyfish (*Xiphophorus maculatus*) and analyse their *in vivo* gene expression, revealing the presence of species-specific splice isoforms of transmembrane *IGHM*. We further characterise the *IGH* constant regions of ten additional cyprinodontiform species, including guppy, amazon molly, mummichog and mangrove killifish. Phylogenetic analysis of these constant regions reveals multiple independent rounds of duplication and deletion of the teleost-specific antibody class *IGHZ* in the cyprinodontiform lineage, demonstrating the extreme volatility of *IGH* evolution. Focusing on the cyprinodontiforms as a model taxon for comparative evolutionary immunology, this work provides novel genomic resources for studying adaptive immunity and sheds light on the evolutionary history of the adaptive immune system.

## Introduction

The ancient evolutionary arms race between hosts and parasites has given rise to a wide variety of highly sophisticated offensive and defensive adaptations in different taxa<sup>1</sup>. Among the most complex and effective of these adaptations is the vertebrate adaptive immune system, in which developing B- and T-lymphocytes generate a vast diversity of novel antigen-receptor sequences through dynamic recombination of their genomic sequence<sup>1-3</sup>. By combining this enormous diversity in antigen specificities with antigen-dependent clonal expansion and long-term immune memory<sup>4,5</sup>, vertebrates can progressively improve their protection against recurrent immune challenges while also coping effectively with rapidly-evolving pathogenic threats<sup>6</sup>, dramatically improving their ability to survive and thrive in a complex immune environment.

34 The immunoglobulin heavy chain (*IGH*) is one of the most important antigen-receptor genes in the adaptive  
35 immune system, determining both the effector function and the majority of the antigen-specificity of the anti-  
36 bodies produced by each B-cell<sup>7,8</sup>. The native structure of the *IGH* gene locus has a profound effect on adaptive  
37 immunity in a species, determining the range of gene segment choices available for the VDJ recombination pro-  
38 cess giving rise to novel antigen-receptor sequences<sup>2</sup>, the possible antibody classes (or *isotypes*) available, and  
39 the relationship between VDJ recombination and isotype choice<sup>9</sup>. Understanding the structure of this locus is  
40 therefore essential for understanding adaptive-immune function in any given vertebrate species, while compar-  
41 ing loci between species can provide important insight into the adaptive immune system's complex evolutionary  
42 history<sup>9</sup>.

43 The teleost fishes are the largest and most diverse group of vertebrates, with nearly 30,000 species com-  
44 prising almost half of extant vertebrate diversity<sup>10</sup>. Previous work has characterised the *IGH* locus structure  
45 in a number of teleost species, including zebrafish<sup>11</sup>, medaka<sup>12</sup>, three-spined stickleback<sup>13,14</sup>, rainbow trout<sup>15</sup>,  
46 fugu<sup>16</sup>, and Atlantic salmon<sup>17</sup>. These characterisations have revealed remarkable diversity in the size, structure  
47 and functionality of teleost *IGH* loci<sup>9,18</sup>. However, the number of loci characterised is very small compared to  
48 the total evolutionary diversity of teleost fish, and is mainly confined to major aquaculture species and estab-  
49 lished research models<sup>9,18</sup>, with characterised species typically quite distantly related to one another within the  
50 teleost clade<sup>19</sup>. This relatively sparse sampling of teleost *IGH* loci has prevented higher-resolution analysis of  
51 locus structural evolution across groups of closely related species.

52 Here, we present the first characterisations of *IGH* loci in the Cyprinodontiformes, a large order of teleosts  
53 with representatives in diverse habitats and ecological niches across the world. Complete characterisations were  
54 performed on the loci of the turquoise killifish (*Nothobranchius furzeri*) and southern platyfish (*Xiphophorus*  
55 *maculatus*), two important model organisms for ecological and evolutionary research<sup>20-23</sup>, while the loci of ten  
56 further species (Fig. 1 and Table S2) underwent partial characterisation with a focus on their constant regions.  
57 Comparison of these loci revealed dramatic and unexpected differences in *IGH* locus structure and function, in-  
58 cluding surprising differences in isotype availability and exon usage among different cyprinodontiform species.  
59 Phylogenetic analysis showed that the specialised mucosal antibody isotype *IGHZ* has undergone repeated du-  
60 plication and convergent loss in the course of cyprinodontiform evolution, indicating an unexpected degree of  
61 volatility in the evolution of mucosal adaptive immunity. Taken together, this work significantly extends our  
62 knowledge of constant-region diversity in teleost fish, and establishes the cyprinodontiforms, and especially the  
63 African killifishes, as an ideal model system for comparative evolutionary immunology.

## 64 Results

### 65 The *IGH* loci of *N. furzeri* and *X. maculatus* are highly distinct.

66 In order to assemble and characterise the *IGH* loci in *N. furzeri* and *X. maculatus*, published *IGH* gene segments  
67 from zebrafish<sup>11</sup>, medaka<sup>12</sup> and stickleback<sup>13,14</sup> were aligned to the most recent genome assemblies of *N. furzeri*  
68 and *X. maculatus* (Table S2) using BLAST<sup>24,25</sup>. In *X. maculatus*, a single promising region was identified on  
69 chromosome 16, while in the *N. furzeri* genome a single region on chromosome 6 and a number of unaligned  
70 scaffold sequences were identified as potentially containing parts of the locus. In order to determine which of  
71 the candidate scaffolds were genuine parts of the *N. furzeri* *IGH* locus and integrate them into a continuous  
72 locus sequence, bacterial artificial chromosome (BAC) clones from the killifish genomic BAC library<sup>21</sup> were  
73 identified on the basis of alignment of their end sequences to promising genome scaffolds, sequenced on an  
74 Illumina MiSeq machine and assembled using SPAdes<sup>26</sup> and SSPACE<sup>27</sup>, with final refinements made using end-  
75 to-end PCR and Sanger sequencing<sup>28</sup>. The resulting BAC inserts were integrated with the identified genome

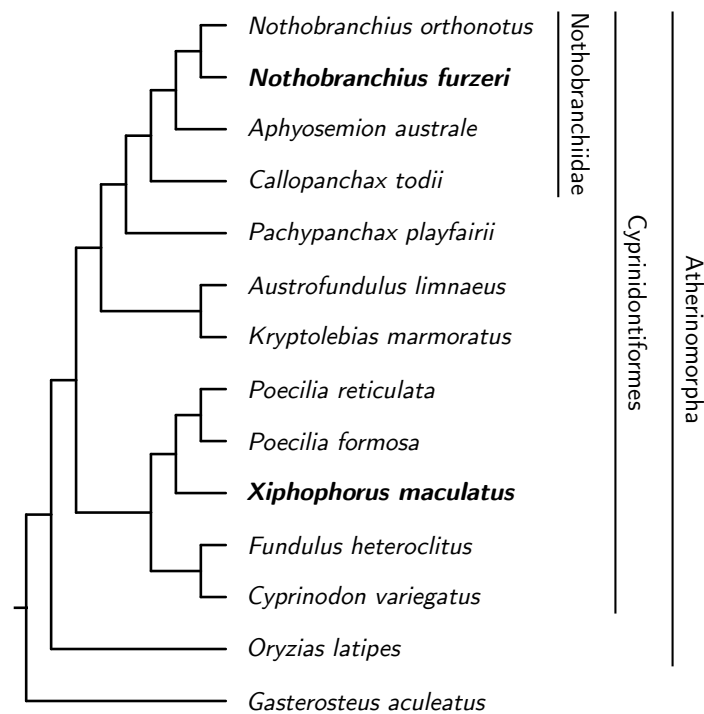

Figure 1: **Cladogram of species included in the *IGH* locus analysis.** Boldface type indicates species for which new, complete *IGH* locus assemblies were generated for this study; other species were either previously-characterised reference species (*G. aculeatus*, *O. latipes*) or underwent constant-region characterisation only (all other species). Labelled vertical bars designate; higher taxa of interest.

76 scaffolds (Fig. S3) to produce a single, contiguous locus sequence, on which *IGH* gene segments were identified  
 77 through more stringent alignment to sequences from reference species (Methods).

78 The *IGH* locus in *Nothobranchius furzeri* occupies roughly 306 kb on chromosome 16 (NFZ v2.0, ac-  
 79 cession TBD), while that of *Xiphophorus maculatus* occupies roughly 293 kb on chromosome 16 (scaffold  
 80 NC\_036458.1, Genbank accession GCA\_002775205.2). While similar in size, the two loci differ markedly in  
 81 organisation and content: while the *N. furzeri* locus comprises two distinct subloci on opposite strands (*IGH1*  
 82 and *IGH2*, Fig. 2a), that of *X. maculatus* forms a single long configuration without any additional subloci  
 83 (Fig. 2b). The two subloci of the *N. furzeri* locus exhibit a very high degree of synteny with one another in the  
 84 JH and constant regions, while the VH and DH regions are more divergent, with what appear to be repeated  
 85 deletion events in the VH/DH regions of *IGH2* (Fig. 2c).

86 Three constant-region isotypes have been observed in previously-published teleost loci: *IGHM* and *IGHD*,  
 87 which are universal in teleosts and homologous to the isotypes of the same names in mammals, and *IGHZ*  
 88 (also known as *IGHT*), which is teleost-specific and absent in a minority of previously published loci<sup>9,18</sup>. *X.*  
 89 *maculatus* *IGH*, *N. furzeri* *IGH1* and *N. furzeri* *IGH2* all contain intact and highly similar *IGHM* and *IGHD*  
 90 constant regions, with a six-exon  $C_{\mu}1-C_{\mu}2-C_{\mu}3-C_{\mu}4-TM1-TM2$  configuration for *IGHM* and a twelve-exon  
 91  $C_{\delta}1-(C_{\delta}2-C_{\delta}3-C_{\delta}4)_2-C_{\delta}5-C_{\delta}6-C_{\delta}7-TM1-TM2$  configuration for *IGHD* (Fig. 2a and 2b). Such expansion  
 92 of *IGHD* through tandem duplications of the  $C_{\delta}2-C_{\delta}3-C_{\delta}4$  exons is common in teleosts and has also been  
 93 observed in zebrafish, channel catfish and Atlantic salmon<sup>9</sup>. Secretory forms of *IGHD* have previously been  
 94 observed in a minority of teleost loci, produced via either a specialised secretory exon<sup>29</sup> or a post- $C_{\delta}7$  secretory  
 95 tail<sup>30</sup>; however, neither of these configurations could be found in either *N. furzeri* or *X. maculatus*, and it may  
 96 be the case that *IGHD* is expressed solely in transmembrane form in these species.

97 Previous work in rainbow trout has shown that, while *IGHM* is primarily responsible for the serum response  
98 to antigenic stimulus, the mucosal response in at least some teleost species is primarily mediated by *IGHZ*<sup>31,32</sup>,  
99 suggesting that this isoform has a specialised mucosal role analogous to *IGHA* in mammals. Unlike *IGHM* and  
100 *IGHD*, *IGHZ* is completely absent from both subloci of the *N. furzeri* *IGH* locus. In contrast, the *X. maculatus*  
101 *IGH* locus contains two distinct *IGHZ* constant regions: *IGHZ1* and *IGHZ2*. *IGHZ2*, like most *IGHZ* constant  
102 regions in characterised teleost loci<sup>9</sup>, is located downstream of the VH region and upstream of the larger DH  
103 and JH regions preceding *IGHM*; in contrast, and much more unusually, *IGHZ1* is located at the far 5' end of the  
104 *X. maculatus* locus (Fig. 2b). Despite sharing a common six-exon C<sub>ζ</sub>1-C<sub>ζ</sub>2-C<sub>ζ</sub>3-C<sub>ζ</sub>4-TM1-TM2 configuration  
105 (Fig. 2b), these two paralogous constant regions are highly distinct, with an average of only 48.0 % amino-acid  
106 sequence identity between corresponding C<sub>ζ</sub> exons (Fig. 2d), indicating a relatively ancient origin; in contrast,  
107 corresponding C<sub>μ</sub> and C<sub>δ</sub> exons in the two *N. furzeri* *IGH* subloci exhibit an average of 100 % and 98.6 %  
108 amino-acid sequence identity across subloci respectively (Fig. 2d), suggesting a much more recent duplication  
109 event.

110 In terms of the variable regions of the *IGH* gene, the most striking difference between the two loci is in the  
111 total number of VH regions: 125 in *X. maculatus* compared to only 24 in *N. furzeri*. In contrast, the number of  
112 DH and JH regions are similar between the two species, with 14 DH and 17 JH segments in *N. furzeri* and 14  
113 DH and 15 JH in *X. maculatus*. In *X. maculatus*, only a single VH, DH and JH segment are present upstream  
114 of *IGHZ1*, suggesting only a single V/D/J combination is available to antibodies of this isotype; most other  
115 segments are present in six V<sub>n</sub>D<sub>1-3</sub>J<sub>1</sub> blocks between *IGHZ1* and *IGHZ2*, with larger blocks of DH and JH  
116 segments between *IGHZ2* and *IGHM*. This (V-D-J)<sub>n</sub>-C block structure, which is also observed in *N. furzeri*  
117 *IGH1*, is in some ways intermediate between the classic translocon configuration seen in most teleost *IGH* loci  
118 and the multi-cluster configuration observed in sharks<sup>18,33</sup>.

### 119 ***N. furzeri* and *X. maculatus* express distinct forms of transmembrane *IGHM*.**

120 The six-exon genomic structure of the *IGHM* constant region is highly conserved across the jawed vertebrates,  
121 with similar configurations observed in mammals, teleost fishes and elasmobranchs<sup>9,18</sup>. In all these groups, the  
122 choice between secretory and transmembrane *IGHM* is made via alternative splicing following transcription,  
123 with the secretory form consistently adopting a four-exon C<sub>μ</sub>1-C<sub>μ</sub>2-C<sub>μ</sub>3-C<sub>μ</sub>4 configuration. Transmembrane  
124 *IGHM*, in contrast, differs in configuration between taxa<sup>9</sup>: in mammals, a cryptic splice site within C<sub>μ</sub>4 is used  
125 to connect the transmembrane exons, while in teleosts the canonical splice site at the end of C<sub>μ</sub>3 is typically  
126 used, excising C<sub>μ</sub>4. Unusually, however, the primary configuration of *IGHM-TM* in medaka (*Oryzias latipes*)  
127 has been found to differ from that of other teleosts, with C<sub>μ</sub>2 spliced directly to TM1 and excising C<sub>μ</sub>3 and  
128 C<sub>μ</sub>4<sup>9,12</sup> (Fig. 3a). Given this surprising diversity, we decided to investigate which splice isoforms are expressed  
129 in *N. furzeri* and *X. maculatus*.

130 To investigate the exon configuration of expressed *IGH* mRNA in *N. furzeri* and *X. maculatus*, published  
131 RNA-sequencing reads from both species (Table S3) were mapped to their respective *IGH* loci using STAR<sup>34</sup>.  
132 Surprisingly, the results revealed that the two species utilised different exon configurations for transmembrane  
133 *IGHM*: in *X. maculatus*, the standard teleost five-exon configuration was used (Fig. 3c), while *N. furzeri* utilised  
134 the unusual four-exon configuration seen in medaka (Fig. 3b), demonstrating that both configurations persist  
135 within the cyprinodontiform lineage.

136 In contrast to *IGHM*, both *N. furzeri* and *X. maculatus* shared a common configuration of transmembrane  
137 *IGHD*, with all twelve exons expressed in series. As in other teleosts<sup>9</sup>, expressed *IGHD* in both species began  
138 with a chimeric C<sub>μ</sub>1 exon from the upstream *IGHM* constant region (Fig. S1). In *X. maculatus*, meanwhile,  
139 both *IGHZ1* and *IGHZ2* expressed a six-exon transmembrane isoform, while *IGHZ1* was also found to give

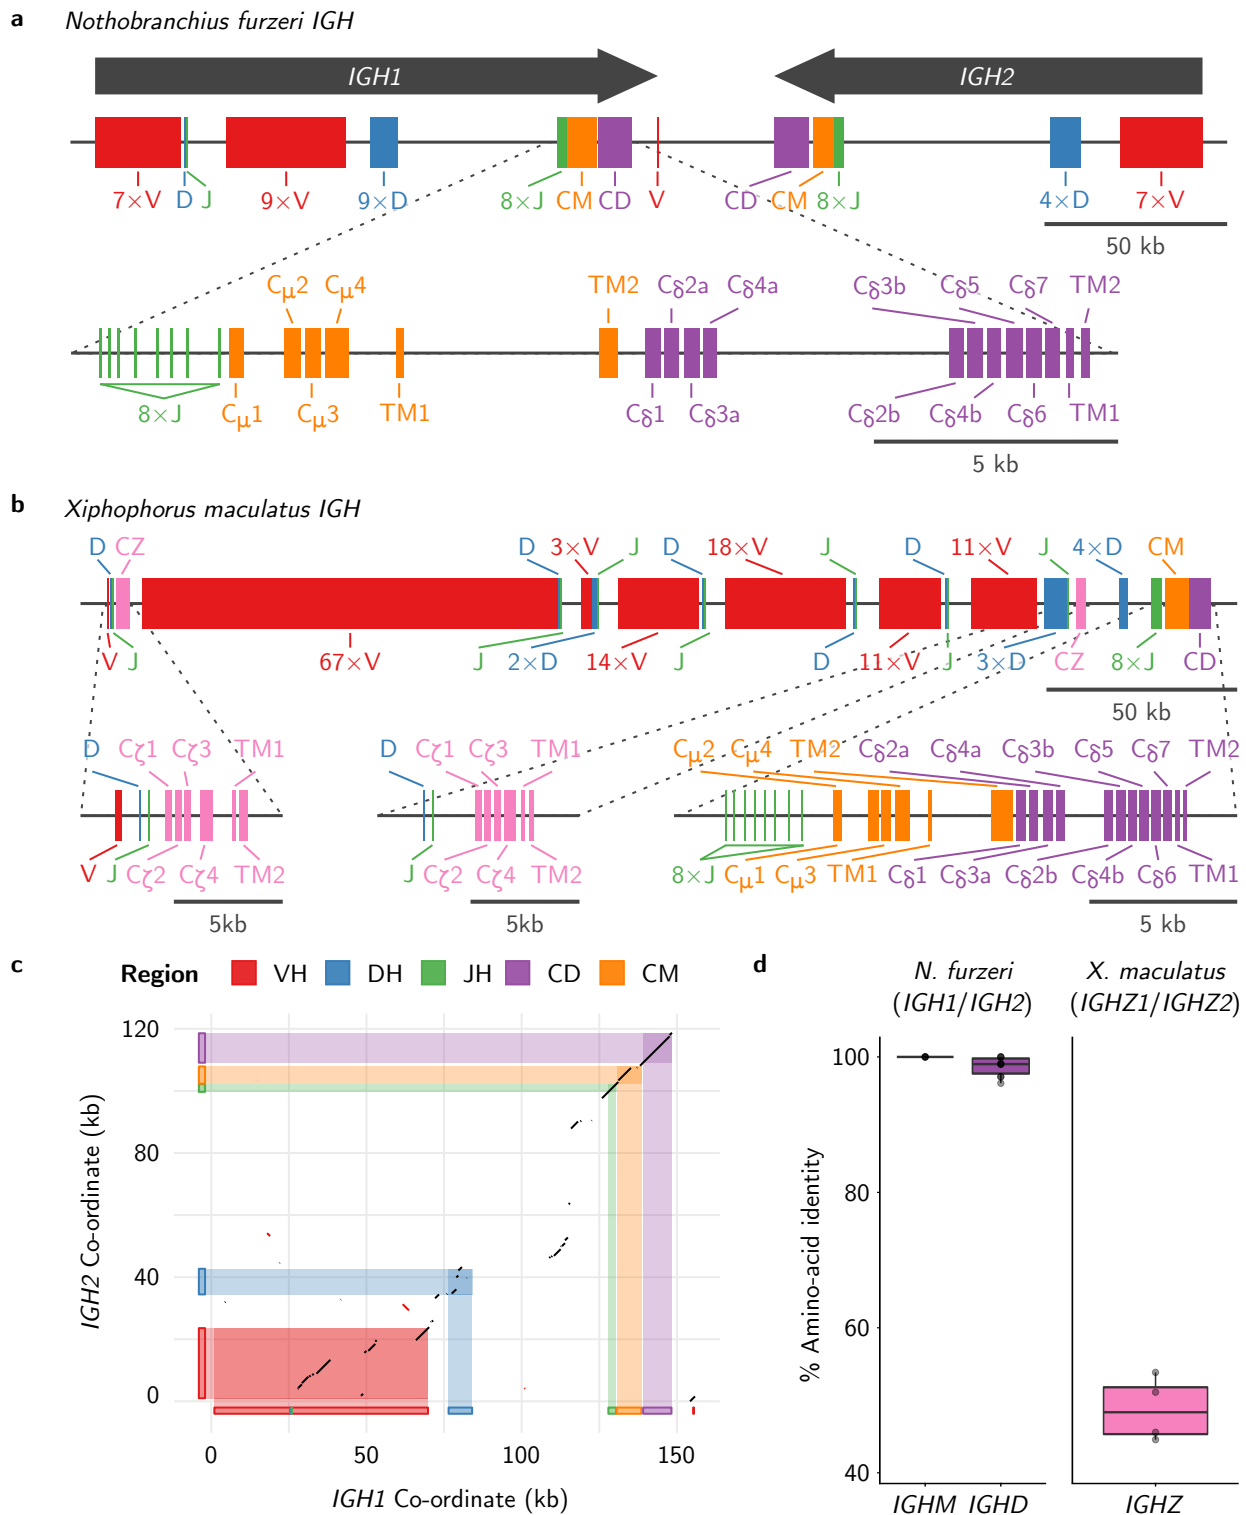

Figure 2: **IGH locus structure in *Nothobranchius furzeri* and *Xiphophorus maculatus*.** **a**, Arrangement of VH, DH, JH and constant regions on the *N. furzeri* IGH locus, indicating the two subloci IGH1 and IGH2 and the detailed exon composition of the IGH1 constant regions. **b**, VH, DH, JH and constant regions on the *X. maculatus* IGH locus, indicating the detailed exon composition of each constant region. **c**, Synteny dot plot of sequential best matches between *N. furzeri* IGH1 and IGH2 sequences, with gene-segment regions in each sublocus indicated by coloured rectangles along each axis. **d**, Boxplots of percentage amino-acid sequence identity between corresponding  $C_{\mu}$  and  $C_{\delta}$  exons in *N. furzeri* IGH1 vs IGH2 subloci (left) or between corresponding  $C_{\zeta}$  exons in *X. maculatus* IGHZ1 vs IGHZ2 constant regions (right).

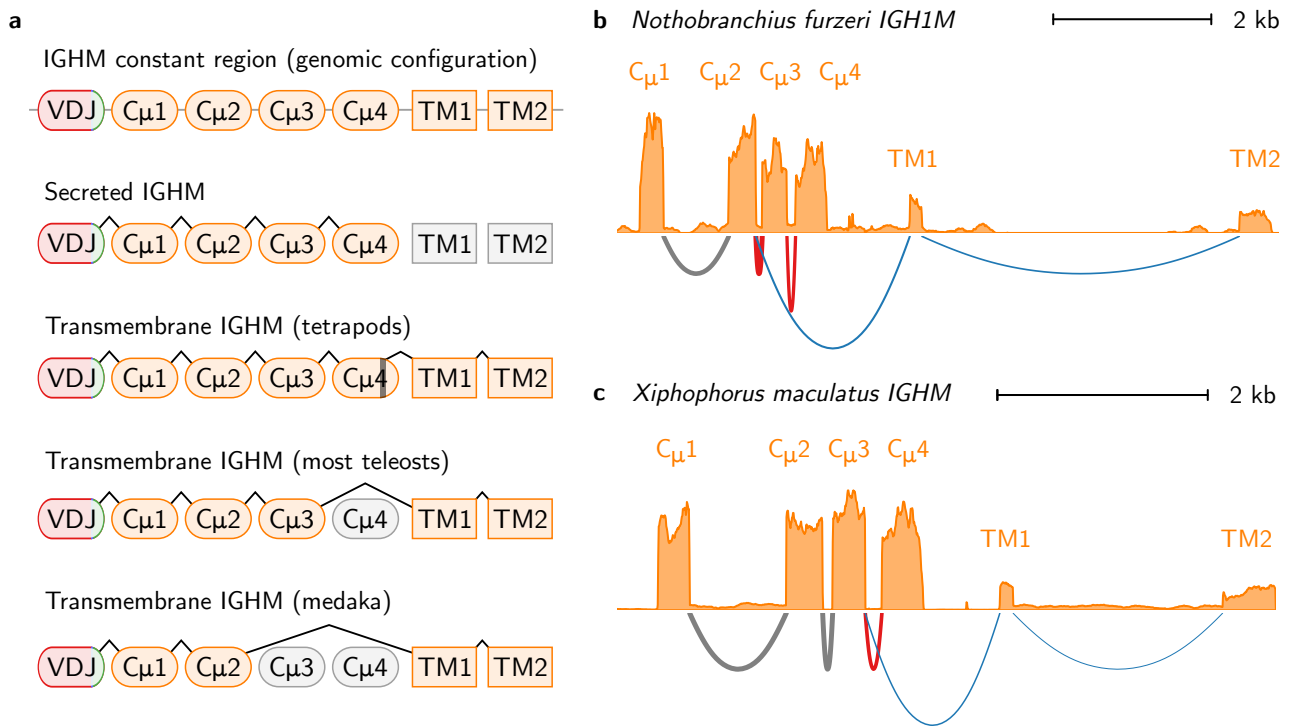

Figure 3: **RNA-sequencing data reveals distinct transmembrane isoforms of *IGHM* in *X. maculatus* and *N. furzeri*.** **a**, Schematic of *IGHM* splice isoforms in different vertebrate taxa<sup>9</sup>. **b-c**, Read coverage histograms and Sashimi plots of alignment and splicing behaviour of RNA-sequencing reads aligned to the *IGHM* constant regions of **a**, *X. maculatus* and **b**, *N. furzeri*, showing the alternative splicing of transmembrane (blue) and secreted (red) isoforms in both species and the difference in exon usage in *IGHM-TM* between species.

140 rise to a four-exon secreted isoform comprising  $C_{\zeta}1$  to  $C_{\zeta}4$  and a run-on secretory tail; while a tail sequence  
 141 was also found following  $C_{\zeta}4$  in *IGHZ2*, no expression of a distinct secretory isoform was detectable in the  
 142 RNA-sequencing data for this constant region (Fig. S2).

### 143 ***IGHZ* has undergone repeated duplication and loss in the Cyprinodontiformes.**

144 Medaka (*Oryzias latipes*) is the closest relative of either *N. furzeri* or *X. maculatus* whose *IGH* locus has pre-  
 145 viously been characterised, and one of the few teleost species previously known to lack the teleost-specific  
 146 isoform *IGHZ*<sup>9,12,18</sup>. Despite this close relationship, the presence of multiple intact *IGHZ* constant regions in  
 147 *X. maculatus* strongly implies that the absence of this isotype in medaka and *N. furzeri* is the result of two  
 148 independent deletion events, suggesting that isotype-loss events in teleost *IGH* may be relatively frequent. To  
 149 investigate this hypothesis in more detail, we identified and characterised *IGH* constant-region sequences in  
 150 the genomes of ten further cyprinodontiform species (Fig. 1 and Table S2), as well as a new and improved  
 151 medaka genome assembly (Genbank accession GCA\_002234675.1), and investigated the constant-region iso-  
 152 forms present in each species.

153 The analysed species showed a high degree of variety in locus structure, with dramatic variation in the  
 154 number and arrangement of constant-region sequences (Fig. 4 and Tables S22 to S24). Of the thirteen species  
 155 investigated, all had at least one tandem pair of *IGHM* and *IGHD* constant regions, while eight possessed at least  
 156 one complete *IGHZ* constant region (Fig. 4). Of the exceptions, *Austrofundulus limnaeus* was found to exhibit  
 157 an orphaned, pseudogenised *IGHZ-TM1* exon but no  $C_{\zeta}$  exons in the current genome assembly, while no *IGHZ*  
 158 exons at all were found in the genomes of *O. latipes*, *N. furzeri*, *Aphyosemion australe*, or *Nothobranchius*  
 159 *orthonotus*. Assuming that *IGHZ*, once deleted, cannot be restored to the *IGH* locus in a lineage, a simple

160 visualisation on a species tree (Fig. 5a) confirms that that medaka and *N. furzeri* represent two distinct *IGHZ*  
161 deletion events; *A. limnaeus* appears to represent another independent deletion event, for a total of at least three  
162 *IGHZ* deletions within the clade containing the cyprinodontiforms and medaka.

163 In addition to being lost repeatedly, *IGHZ* also demonstrates a relatively high level of multiplicity within the  
164 cyprinodontiforms, with a geometric mean of 1.93 *IGHZ* constant regions per *IGHZ*-bearing locus (a 1.62:1 ra-  
165 tio relative to *IGHM* or *IGHD*). This multiplicity suggests a more complex evolutionary history than can be cap-  
166 tured by a simple presence/absence metric. Concordantly, phylogenetic analysis with PRANK<sup>35</sup> and RAxML<sup>36</sup>  
167 (Fig. 5b, alignment length 1733 bp, 35% gaps/missing characters) reveals three distinct monophyletic clades  
168 (or subclasses) of *IGHZ* constant regions in the Cyprinodontiformes, *IGHZA* to *C*, each of which is present in  
169 multiple different species and appears to have been present in the common ancestor of the eight *IGHZ*-bearing  
170 species analysed. The only locus whose *IGHZ* could not be assigned to one of these subclasses, that of *Pachy-*  
171 *panchax playfairii*, appears to have undergone a fusion event, with *P. playfairii* C<sub>ζ</sub>1 and C<sub>ζ</sub>2 aligning strongly  
172 to *IGHZB* exons from other species while *P. playfairii* C<sub>ζ</sub>3 and C<sub>ζ</sub>4 show more ambiguous alignment behaviour  
173 favouring *IGHZA* or *IGHZC* (Fig. 6).

174 In summary, in addition to the still-universal primitive antibody classes *IGHM* and *IGHD*, the cyprinodon-  
175 tiforms ancestrally possessed at least three subclasses of *IGHZ*, which subsequently evolved in parallel across  
176 the clade. Each of these subclasses has been lost in multiple cyprinodontiform species, with different species  
177 showing distinct patterns of retention and loss, and in at least one lineage – that of *Pachypanchax playfairii*  
178 – two different *IGHZ* lineages appear to have fused to produce a chimeric isotype. All three subclasses are  
179 missing from a subset of species in the Nothobranchiidae (including *Nothobranchius furzeri*), and also appear  
180 to have been independently lost in *Austrofundulus limnaeus*, further demonstrating the remarkable volatility of  
181 the *IGH* locus across evolutionary time.

## 182 Discussion

183 The immunoglobulin heavy chain locus is notable for its size and complexity, as well as for the central role it  
184 plays in vertebrate adaptive immunity and survival. Previous research in teleost fishes has revealed a remarkable  
185 degree of diversity in the length, organisation, and isotype composition of different *IGH* loci<sup>9,18</sup>, with important  
186 but understudied implications for antibody diversity and immune functionality among teleost species.

187 In this study, we presented the first detailed characterisations of *IGH* loci from the Cyprinodontiformes, a  
188 widespread order of teleost fishes that include many important model systems in evolutionary biology and ecol-  
189 ogy. Two such species, the turquoise killifish *Nothobranchius furzeri* and the southern platyfish *Xiphophorus*  
190 *maculatus*, underwent complete assembly and characterisation of their *IGH* loci, while ten other cyprinodontif-  
191 orm species received partial characterisations focused on their constant regions. These additional species were  
192 selected on the basis of their relatedness to *N. furzeri* and *X. maculatus* and their prevalence in the research liter-  
193 ature, and included a number of prominent ecological model organisms (including guppy<sup>37</sup>, mummichog<sup>38</sup> and  
194 mangrove rivulus<sup>39</sup>), yielding a dataset with significant relevance to researchers studying the role of infection  
195 and immunity in teleost ecology.

196 The *IGH* loci of *X. maculatus* and *N. furzeri* exhibited radically different locus organisations, with dra-  
197 matic differences in VDJ number, locus organisation and isotype availability. These results are consistent with  
198 previous findings of highly-diverse teleost loci and support a process of rapid locus evolution in the cyprinodon-  
199 tiforms. Characterisation of the constant regions of additional cyprinodontiform species confirmed this finding,  
200 with several groups of closely-related species (e.g. *Nothobranchius furzeri*, *Nothobranchius orthonotus* and  
201 *Callopanchax toddi*) showing highly divergent locus structures and constant-region availability (Fig. 4).

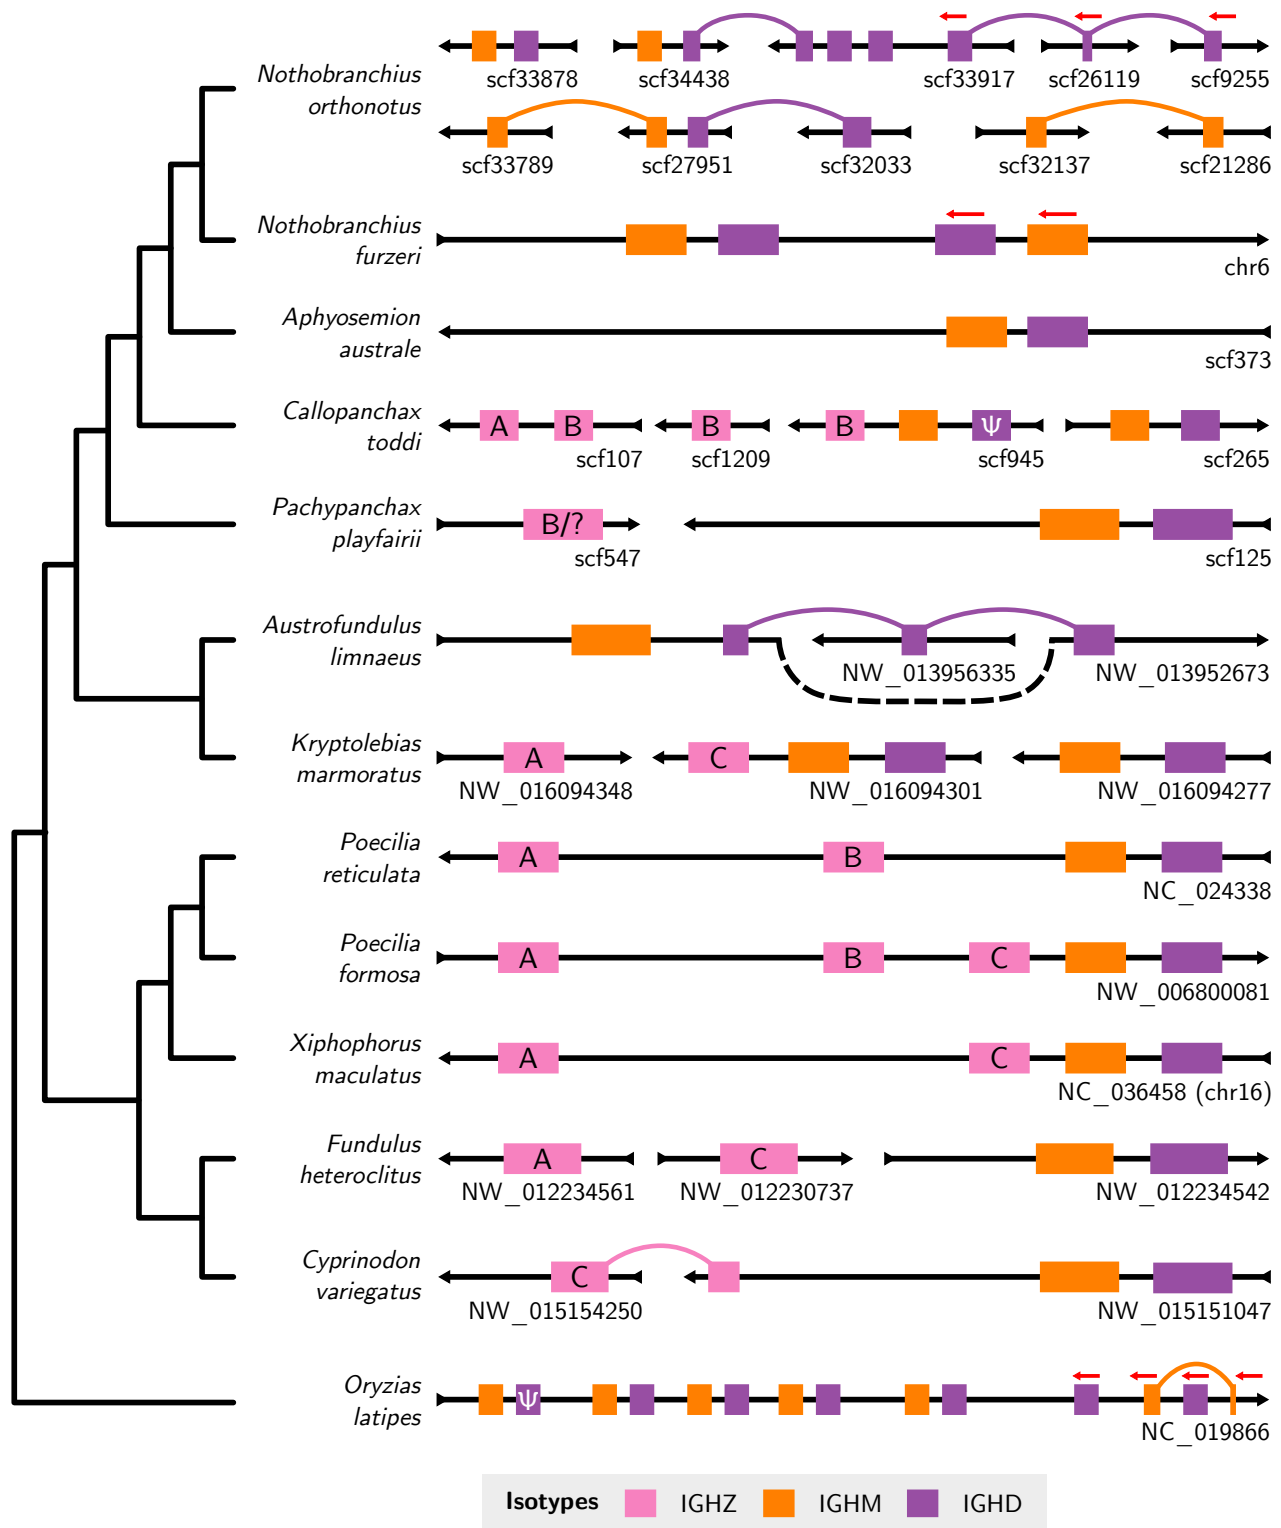

**Figure 4: Constant-region organisation in the Atherinomorpha.** Schematic of newly-characterised *IGH* constant regions in the genomes of thirteen species from the Atherinomorpha (Cyprinodontiformes + medaka). Scaffold orientation is given by the black arrows; constant regions are oriented left-to-right unless otherwise specified (red arrows). Scaffold names are displayed beneath each scaffold on the right-hand side. Links between regions on different scaffolds indicate that exons from what appears to be the same constant region are distributed across multiple scaffolds in the order indicated; the order of unlinked scaffolds is arbitrary. The isotype of each region is given by its colour; *IGHZ* regions are further annotated with their subclass (Fig. 5b). Clearly pseudogenised constant regions are indicated by  $\Psi$ . Isotype length, scaffold length, and scaffold position are not to scale. Variable regions and lone, isolated constant-region exons are not shown. The cladogram to the left indicates evolutionary relationships between species (Fig. 1).



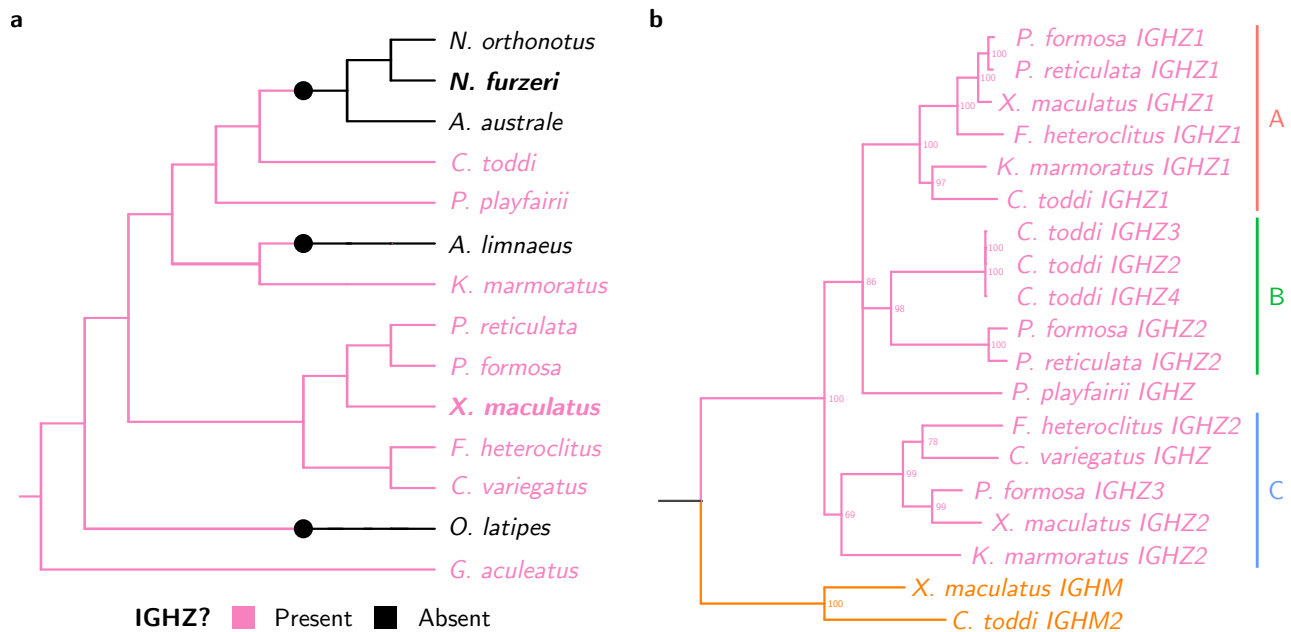

Figure 5: **IGHZ has undergone repeated duplication and loss in the Cyprinodontiformes.** **a**, Cladogram of species from Fig. 1, with three-spined stickleback (*Gasterosteus aculeatus*) as the outgroup, coloured according to known *IGHZ* status. Large coloured points indicate inferred state-change events. **b**, Phylogram of concatenated  $C_{\gamma}$  1-4 nucleotide sequences from  $n$  *IGHZ*-bearing Cyprinodontiform species, with  $C_{\mu}$  1-4 sequences from two species as outgroup (in orange). Nodes with less than 65 % bootstrap support are collapsed into polytomies, while major monophyletic subclasses are annotated on the right.

202 It is interesting to speculate on the origins of this extremely rapid diversification in gene structure. Very little  
203 is known about the relationship between environmental context and immune locus structure; it is possible that  
204 part of the variety in *IGH* gene locus structure in the Cyprinodontiformes represents divergent adaptations to  
205 different immune environments. Alternatively, this diversification may be primarily the result of unusually high  
206 rates of stochastic, non-adaptive changes in gene structure in germline *IGH*, or to relaxation of selective con-  
207 straints on locus structure. Finally, at least some of the difference between locus structures in different species  
208 is likely to be attributable to differences in assembly quality; for example, the characterisation of medaka con-  
209 stant regions presented here contains many fewer unusual or incomplete constant regions than that presented in  
210 the published medaka *IGH* locus<sup>12</sup>, primarily due to the increased quality of the more recent medaka genome  
211 assemblies. Issues with assembly quality could also account for the apparent complexity of the *Nothobranchius*  
212 *orthonotus* locus, as the genome of this species was assembled from a wild-caught individual with a high degree  
213 of heterozygosity<sup>40</sup>.

214 The teleost-specific isotype *IGHZ* is widespread among teleost species, and appears to play a specialised  
215 role in mucosal immunity<sup>31,32</sup>. Before the publication of this work, only two teleost species (medaka and chan-  
216 nel catfish) were known or thought to lack the *IGHZ* antibody isotype in their *IGH* loci, suggesting that the loss  
217 of *IGHZ* may be a relatively rare event. However, in addition to confirming the absence of *IGHZ* in medaka,  
218 the work presented here has identified four new teleost species (*Nothobranchius furzeri*, *Nothobranchius or-*  
219 *thonotus*, *Aphyosemion australe* and *Austrofundulus limnaeus*) that appear to lack *IGHZ* constant regions in  
220 their *IGH* loci, representing two distinct and previously unknown loss events independent from that affecting  
221 the closely-related medaka. This finding, which triples the number of known teleost species without *IGHZ* and  
222 doubles the number of known loss events, is even more striking when combined with the discovery that the  
223 cyprinodontiform common ancestor likely had no fewer than three distinct *IGHZ* constant regions (Fig. 5b), all

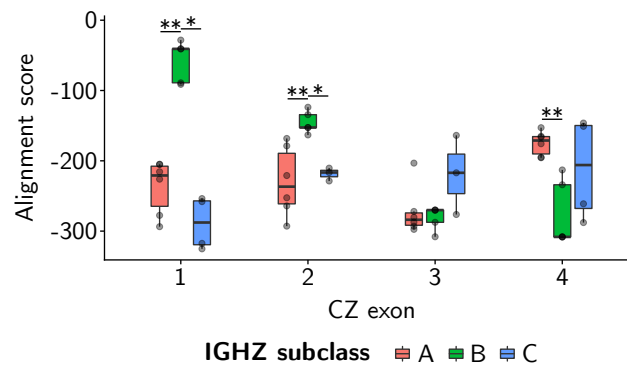

Figure 6: *Pachypanchax playfairii* IGHZ is composed of exons from multiple ancestral subclasses. Box-plots of Needleman-Wunsch alignment scores between the amino-acid sequences of *Pachypanchax playfairii* C<sub>ζ</sub> exons and those of equivalent exons from seven other IGHZ-bearing cyprinodontiform species, demonstrating the differing affinity of different *P. playfairii* exons for each of the three IGHZ subclasses. Less negative scores indicate a stronger alignment. Pairwise *p*-values were computed using nonparametric Mann-Whitney *U* tests (\*: 0.01 < *p* ≤ 0.05; \*\*: 0.001 < *p* ≤ 0.01).

224 of which would have to be lost on the way to any IGHZ-free lineage. Taken together, these observations sug-  
225 gest that the presence/absence of IGHZ in the wider teleost clade may be much more volatile than suggested by  
226 previously available locus data, and raises the possibility that, given sufficiently high-density analysis of other  
227 teleost lineages, a surprisingly high frequency of IGHZ-lacking species may also be found elsewhere.

228 The absence of IGHZ from so many species in this analysis naturally raises the important question of how  
229 the mucosal adaptive immune system in these species differs from that of their IGHZ-bearing relatives: how,  
230 and to what extent, can the primitive isotype IGHM compensate for the loss of a specialised mucosal antibody  
231 class? This question is especially interesting in the case of IGHZ-lacking species with close IGHZ-bearing  
232 relatives (e.g. *Nothobranchius furzeri* and *Callopanchax toddi*, or *Austrofundulus limnaeus* and *Kryptolebias*  
233 *marmoratus*); if it is the case that mucosal immune responses differ systematically between these species, such  
234 that IGHM takes up some or all of the roles normally played by IGHZ, then uncovering the mechanisms by  
235 which this shift is regulated could reveal important new insights into decision-making and control of humoral  
236 adaptive immunity. Similarly, characterising the different functional roles and responses of different IGHZ  
237 subclasses in cyprinodontiform fishes could yield important information about how these species interact with  
238 different aspects of their immune environment.

239 Another important difference between *N. furzeri* and *X. maculatus*, whose evolution is more difficult to  
240 investigate using genomic data, is the exon-usage behaviour of expressed IGHM. In *X. maculatus*, transmem-  
241 brane IGHM adopts the same configuration as that seen in most teleosts: a five-exon isoform in which the end  
242 of C<sub>μ</sub>3 is spliced to the start of TM1 and C<sub>μ</sub>4 is excised. Conversely, in *N. furzeri* IGHM-TM adopts the same  
243 four-exon configuration observed in medaka, in which C<sub>μ</sub>3 is also excluded. Given that *X. maculatus* adopts  
244 the primitive configuration, the recurrence of the same unusual configuration in both medaka and turquoise  
245 killifish is surprising, and indicates that both configurations are present in the Cyprinodontiformes; more infor-  
246 mation about the evolutionary history of this divergence in splicing behaviour, along with data on the functional  
247 consequences of including or excluding C<sub>μ</sub>3 from the transmembrane protein structure of IGHM, could yield  
248 important new insights into antibody evolution and functionality in teleost fishes.

249 One of the most important advances in immunology in recent years has been the explosion of quantitative,  
250 high-throughput approaches for investigating the composition, diversity and functionality of the antibody reper-  
251 toire<sup>41-43</sup>. As a direct result of the research presented here, twelve previously-uncharacterised teleost species  
252 now have databases of IGH constant-region sequences available, enabling these immunoglobulin-sequencing

253 approaches to be applied in the cyprinodontiforms for the first time. Combining antibody-repertoire data with  
254 other information gathered from wild fishes could yield important new insights into the role of the adaptive  
255 immune system in the lives and evolution of wild vertebrates. In addition, the possibility of sequencing the  
256 repertoires of several related species adds an exciting comparative dimension previously missing in immune-  
257 repertoire studies, opening up the possibility of simultaneously comparing the response of different closely-  
258 related species to a common immunogenic stimulus. This comparative element would be especially interesting  
259 in the context of investigating the repertoire responses of closely related species with different *IGHZ* genotypes,  
260 as well as for comparing the functional roles of different *IGHZ* subclasses across species.

261 In combination with the genomic and functional findings discussed above, such large-scale comparative  
262 repertoire studies provide a novel opportunity for comparative evolutionary immunology in the Cyprinodontif-  
263 ormes, with the potential to greatly expand our knowledge of the interaction between ecological conditions and  
264 the evolution of the adaptive immune system in teleost fishes.

## 265 **Methods**

### 266 **Assembling the *Nothobranchius furzeri* *IGH* locus.**

267 To identify promising candidate sequences from which to assemble the *N. furzeri* *IGH* locus sequence, VH,  
268 JH and CH sequences from three reference species with published *IGH* loci (zebrafish<sup>11</sup>, medaka<sup>12</sup> and three-  
269 spined stickleback<sup>13,14</sup>) were aligned to the most recent assembly of the *N. furzeri* genome<sup>44</sup> (NFZ v2.0, Ac-  
270 cession TBD) using BLAST<sup>24,25</sup>. Scaffolds containing promising alignments to at least two distinct types of  
271 *IGH* gene segment, or which covered at least 1 % of the total length of the scaffold, were retained as potentially  
272 containing parts of the *IGH* locus.

273 In order to determine which of these candidate scaffolds contained parts of the *IGH* locus and integrate  
274 them into a single sequence, clones from the killifish genomic BAC library<sup>21</sup> were identified on the basis of  
275 alignment of their end sequences to promising genome scaffolds. These BAC clones were provided to us by  
276 the FLI in Jena and isolated and sequenced as described in the next section.

277 Following sequencing, demultiplexed and adapter-trimmed MiSeq reads were processed with Trimmomatic<sup>45</sup>  
278 to trim low quality sequence and Bowtie 2<sup>46</sup> to remove contaminating *E. coli* sequences, then corrected with  
279 QuorUM<sup>47</sup> or BayesHammer<sup>26,48</sup> and assembled with SPAdes<sup>26</sup>. Following assembly, any *E. coli* scaffolds  
280 resulting from residual contaminating reads were identified by aligning scaffolds to the *E. coli* genome using  
281 BLASTN<sup>24,25</sup>, and scaffolds containing significant matches were discarded. The remaining scaffolds were then  
282 scaffolded using SSPACE<sup>27</sup> using jumping libraries from the killifish genome project<sup>20,21,44</sup>.

283 In order to guarantee the reliability of the assembled scaffolds, the assemblies produced with BayesHammer-  
284 and QuorUM-corrected reads were compared, and scaffolds were broken into segments whose contiguity was  
285 agreed on between both assemblies. To integrate these fragments into a contiguous insert assembly, points of  
286 agreement between BAC assemblies from the same genomic region (e.g. two scaffolds from one assembly  
287 aligning concordantly to one scaffold from another) and between BAC assemblies and genome scaffolds, were  
288 used to combine scaffolds where possible. Any still-unconnected scaffolds were assembled together through  
289 pairwise end-to-end PCR using Kapa HiFi HotStart ReadyMix PCR Kit according to the manufacturer's in-  
290 structions, followed by Sanger sequencing<sup>28</sup> (Eurofins). PCR primers for end-to-end PCR were designed using  
291 Primer3<sup>49</sup>.

292 Following BAC insert assembly, assembled inserts were screened for *IGH* locus segments in the same  
293 manner described for genome scaffolds above. Passing BAC inserts were aligned to the candidate genome  
294 scaffolds and chromosome sequence with BLASTN and integrated manually (Fig. S3), giving priority in the

295 event of a sequence conflict to (i) any sequence containing a gene segment missing from the other, and (ii) the  
296 genome scaffold sequence if neither sequence contained such a segment. BACs and scaffolds which could not  
297 be integrated into the locus sequence in this way were discarded as orphans.

### 298 **BAC isolation and sequencing.**

299 All BAC clones that were sequenced for this research were provided by the FLI in Jena as plate or stab cultures  
300 of transformed *E. coli*, which were replated and stored at 4°C. Prior to isolation, the clones of interest were  
301 cultured overnight in at least 100 ml LB medium. The resulting liquid cultures were transferred to 50 ml conical  
302 tubes and centrifuged (10-25 min, 4°C, 3500g) to pellet the cells. The supernatant was carefully discarded and  
303 the cells were resuspended in 18 ml QIAGEN buffer P1.

304 After resuspension, the cultures underwent alkaline lysis to release the BAC DNA and precipitate genomic  
305 DNA and cellular debris. 18 ml QIAGEN buffer P2 was added to each tube, which was then mixed gently but  
306 thoroughly by inversion and incubated at room temperature for 5 min. 18 ml ice-chilled QIAGEN neutralisation  
307 buffer P3 was added to precipitate genomic DNA and cellular debris, and each tube was mixed gently but  
308 thoroughly by inversion and incubated on ice for 15 min. The tubes were then centrifuged (20-30 min, 4°C,  
309 12000g) to pellet cellular debris and the supernatant was transferred to new conical tubes. This process was  
310 repeated at least two more times, until no more debris was visible in any tube; this repeated pelleting was  
311 necessary to minimise contamination in each sample, as the normal column- or paper-based filtering steps used  
312 during alkaline lysis resulted in the loss of the BAC DNA.

313 Following alkaline lysis, the DNA in each sample underwent isopropanol precipitation: 0.6 volumes of  
314 room-temperature isopropanol were added to the clean supernatant in each tube, followed by 0.1 volumes of  
315 3 mol sodium acetate solution. Each tube was mixed well by inversion, incubated for 10-15 min at room tem-  
316 perature, then centrifuged (30 min, 4°C, 12000g) to pellet the DNA. The supernatant was discarded and the  
317 resulting DNA smear was “resuspended” in 1 ml 100 % ethanol and transferred to a 1.5 ml tube, which was  
318 re-centrifuged (5 min, 4°C, top speed) to obtain a concentrated pellet. Finally, the pelleted samples were resus-  
319 pended in QIAGEN buffer EB and purified of proteins and RNA using standard phenol-chloroform extraction  
320 and ethanol precipitation techniques.

321 The resuspended BAC isolates were sent to the Cologne Center for Genomics, where they underwent Illu-  
322 mina Nextera XT library preparation and were sequenced on an Illumina MiSeq sequencing machine (MiSeq  
323 Reagent Kit v3, 2×300 bp reads).

### 324 **Identifying locus scaffolds in other species.**

325 Candidate *IGH* locus sequences in other species (Table S2) were identified in the same manner as for *N. furzeri*,  
326 by aligning VH, JH and CH sequences from reference species to available genome sequences with BLAST. In  
327 the case of *X. maculatus* the reference species used were zebrafish, stickleback, medaka and *N. furzeri*, while for  
328 all other species the gene segments from the *X. maculatus* locus were also used. Additional sequence refinement  
329 with BAC inserts was not necessary in these species: in the case of *X. maculatus* only a single sequence region  
330 (on chromosome 16) was identified, while in the other species a complete locus characterisation (requiring a  
331 single contiguous sequence) was not performed.

### 332 **Characterising constant-region sequences and expression.**

333 Constant-region sequences on candidate locus scaffolds (or, in the case of *N. furzeri* and *X. maculatus*, on com-  
334 plete locus sequences) were identified by mapping CH sequences from reference species to candidate sequences

335 using BLAST. Following alignment of reference sequences, overlapping alignments to reference segments of  
336 the same isotype and exon number were collapsed together, keeping track of the number of collapsed align-  
337 ments and the best E-values and bitscores obtained for each alignment group. Alignment groups with a very  
338 poor maximum E-value ( $> 0.001$ ) were discarded, as were groups overlapping with a much better alignment  
339 to a different isotype or exon type, where “much better” was here defined as a bitscore difference of at least  
340 16.5. Where conflicting alignments to different isotypes or exon types co-occurred without a sufficiently large  
341 difference in bitscore, both alignment groups were retained for manual resolution of exon identity.

342 Following resolution of conflicts, alignment groups underwent a second filtering step of increased strin-  
343 gency, requiring a minimum E-value of  $10^{-8}$  and at least two aligned reference exons over all reference species  
344 to be retained. Each surviving alignment group was then converted to a sequence range, extended by 10 bp  
345 at each end to account for truncated alignments failing to cover the ends of the exon, and used to extract the  
346 corresponding exon sequence into FASTA format. These sequences then underwent manual curation to re-  
347 solve conflicting exon identities, assign exon names and perform initial end refinement based on putative splice  
348 junctions (Tables S4 and S11).

349 In order to validate intron/exon boundaries and investigate splicing behaviour among *IGH* constant-region  
350 exons in *N. furzeri* and *X. maculatus*, published RNA-sequencing data (Table S3) were aligned to the anno-  
351 tated locus using STAR<sup>34</sup>. In both cases, reads files from multiple individuals were concatenated and aligned  
352 together, and the *IGH* locus was masked using RepeatMasker<sup>50</sup> (using the built-in zebrafish repeat parameters)  
353 prior to mapping. Mapped reads spanning predicted exons of more than 10 kb were excluded from the align-  
354 ment, as were read pairs mapping more than 10 kb apart. Following alignment, the resulting SAM files were  
355 processed into sorted, indexed BAM files using SAMtools<sup>51</sup> and visualised with Integrated Genomics Viewer  
356 (IGV<sup>52,53</sup>) to determine intron/exon boundaries of predicted exons, as well as the major splice isoforms present  
357 in each dataset. Read-coverage and Sashimi plots (Fig. 3, S1 and S2) were generated from the alignment data  
358 using Gviz<sup>54</sup>.

359 For species other than *N. furzeri* or *X. maculatus*, intron/exon boundaries were predicted manually based  
360 on BLASTN and BLASTP alignments to closely-related species and the presence of conserved splice-site  
361 motifs (AG at the 5' end of the intron, GT at the 3' end<sup>55</sup>). In cases where no 3' splice site was expected to  
362 be present (e.g. for CM4 or TM2 exons), the nucleotide exon sequence was terminated at the first canonical  
363 polyadenylation site (AATAAA if present, otherwise one of ATAAAA, AGTAAA or TATAAA<sup>56</sup>), while the amino-acid  
364 sequence was terminated at the first stop codon. In many cases, it was not possible to locate a TM2 exon due  
365 to its very short conserved coding sequence (typically only 2 to 4 amino-acid residues<sup>11,13</sup>).

## 366 **Characterising variable-region sequences.**

367 Variable-region gene segments in the *N. furzeri* and *X. maculatus* were identified and characterised using differ-  
368 ent methods depending on segment type. For VH and JH segments, segments from reference species were used  
369 to construct a multiple-sequence alignment with PRANK<sup>35</sup>, which was then used by NHMMER<sup>57</sup> to perform  
370 a Hidden-Markov-Model-based search for matching sequences in the locus. The resulting sequence candidates  
371 were extended on either end to account for boundary errors, then refined manually. In the case of VH sequences,  
372 3' ends were identified by the start of the RSS heptamer sequence (consensus CACAGTG<sup>58</sup>), if present, while 5'  
373 ends and FR/CDR boundaries were identified using IMGT/DomainGapAlign<sup>59</sup> with the default settings; where  
374 necessary, IMGT/DomainGapAlign was also used to IMGT-gap the VH segments in accordance with the IMGT  
375 unique numbering<sup>60</sup>. For JH segments, 5' ends were identified using the RSS heptamer sequence, while the 3'  
376 end was identified using the conserved splice-junction motif GTA.

377 Following extraction and manual curation, VH segments were grouped into families based on their pairwise

378 sequence identity. In order to assign segments to families, the nucleotide sequence of each VH segment in a  
379 locus was aligned to every other segment using Needleman-Wunsch global alignment<sup>61</sup> as implemented in the  
380 Biostrings R package<sup>62</sup>, and the resulting matrix of pairwise sequence identities was used to perform single-  
381 linkage hierarchical clustering on the VH segments. The resulting dendrogram was cut at 80 % sequence  
382 identity to obtain VH families (Fig. S4 to S6). These families were then numbered based on the order of the  
383 first-occurring VH segment from that family in the first *IGH* sublocus in which the family is represented, and  
384 each VH segment was named based on its parent sublocus, its family, and its order among elements of that  
385 family in that sublocus (Table S5 and Tables S12 to S16). JH segments, meanwhile, were named based on their  
386 order within their parent sublocus and, in *X. maculatus*, on whether they were upstream of *IGHZ* or *IGHM*  
387 constant regions (Tables S9 and S20).

388 Unlike VH and JH gene segments, DH segments are too short and unstructured to be found effectively using  
389 an HMM-based search strategy. Instead, DH segments in assembled loci were located using their distinctive  
390 pattern of flanking recombination signal sequences in opposite sense<sup>3</sup>. Potential matches to this pattern were  
391 searched for using EMBOSS FUZZNUC<sup>63</sup>, with a high mismatch tolerance (up to 8 mismatches across the  
392 whole pattern) to account for deviations from the conserved sequence in either or both of the RSSs. Promising  
393 candidate sequences from this search were oriented based on the orientation of flanking VH or JH sequences on  
394 the same scaffold, then underwent a second, more stringent filtering step in which sequences lacking the most  
395 conserved positions in each RSS (in particular, the initial CA motif in the heptamer sequence<sup>58</sup>) were discarded.  
396 Finally, the identified DH candidates were checked manually, candidates without good RSS sequences were  
397 discarded, and flanking RSS sequences were trimmed to obtain the DH segment sequences themselves. As  
398 with the JH segments, these were numbered based on their order within their parent sublocus and, in the case  
399 of *X. maculatus*, on whether they were upstream of *IGHZ* or *IGHM* constant regions (Tables S6 and S18).

## 400 **Phylogenetic inference.**

401 Cladograms of teleost species (Fig. 1 and 5a) were constructed using phylogenetic information from Cui *et al.*<sup>40</sup>  
402 (for African killifishes) and Hughes *et al.*<sup>19</sup> (for other species) and visualised using the ggtree R package<sup>64</sup>.

403 To construct a phylogram of *IGHZ* sequences (Fig. 5b), the nucleotide sequences of C<sub>γ</sub> 1-4 exons from each  
404 *IGHZ* constant region in Tables S22 to S24 were concatenated together into a single sequence per constant re-  
405 gion and aligned to one another using PRANK<sup>35</sup>. The resulting multiple-sequence alignment was then used to  
406 perform maximum-likelihood phylogenetic inference with RAxML<sup>36</sup>, using the SSE3-enabled parallelised ver-  
407 sion of the software, the standard GTR-Gamma nucleotide substitution model, and built-in rapid bootstrapping  
408 with 1000 bootstrap replicates; during tree inference, the third codon position was partitioned into a separate  
409 model. The bootstrap-annotated RAxML\_bipartitions file was inspected and rooted manually in Figtree<sup>65</sup>  
410 and again visualised using ggtree; during tree visualisation, nodes with bootstrap support of less than 65 %  
411 were collapsed into polytomies.

## 412 **Inter- and intralocus sequence comparison.**

413 Synteny between subloci in the *N. furzeri* locus (Fig. 2c) was analysed using the standard synteny pipeline from  
414 the DECIPHER R package<sup>66</sup>, which searches for chains of exact *k*-mer matches within two sequences.

415 Comparison between constant-region exons, either within the same locus (Fig. 2d) or between loci (Fig. 6)  
416 were performed using Needleman-Wunsch exhaustive global alignments<sup>61</sup>, as implemented in the Biostrings R  
417 package<sup>62</sup>, using the default scoring parameters from that package.

## 418 Acknowledgements

419 We would like to thank Kathrin Reichwald for providing the BAC clones used in this study; Mario Ventura and  
420 Nicola Lorusso for early help and support with BAC isolation; Bérénice Benayoun, Anton Korobeynikov, Jorge  
421 Boucas, Franziska Metge and Bernd Wozny for help and advice with the BAC sequence assembly process; and  
422 David Willemsen and Rongfeng Cui for critically reading and reviewing the manuscript. This work was funded  
423 by the Max Planck Institute for Biology of Ageing, the Cologne Graduate School of Ageing Research, the Max  
424 Planck Society and the DFG Collaborative Research Center 1310.

## 425 References

- 426 1. Jack, R. S. in *Pathogen-Host Interactions: Antigenic Variation V. Somatic Adaptations* (eds Hsu, E. &  
427 Du Pasquier, L.) 1–20 (Springer, 2015).
- 428 2. David Jung, Cosmas Giallourakis, Raul Mostoslavsky & Frederick W. Alt. Mechanism and Control of  
429 V(d)j Recombination at the Immunoglobulin Heavy Chain Locus. *Annual Review of Immunology* **24**,  
430 541–570 (2006).
- 431 3. Schatz, D. G. & Swanson, P. C. V(D)J Recombination: Mechanisms of Initiation. *Annual Review of*  
432 *Genetics* **45**, 167–202 (2011).
- 433 4. Kurosaki, T., Kometani, K. & Ise, W. Memory B cells. *Nature Reviews Immunology* **15**, 149–159 (2015).
- 434 5. Magor, B. G. Antibody Affinity Maturation in Fishes—Our Current Understanding. *Biology* **4**, 512–524  
435 (2015).
- 436 6. Mayer, A., Balasubramanian, V., Walczak, A. M. & Mora, T. How a well-adapting immune system re-  
437 members. *arXiv*, 1806.05753 (2018).
- 438 7. Schroeder, H. W. & Cavacini, L. Structure and function of immunoglobulins. *Journal of Allergy and*  
439 *Clinical Immunology* **125**, S41–S52 (2010).
- 440 8. Mix, E., Goertsches, R. & Zett, U. K. Immunoglobulins—Basic considerations. *Journal of Neurology* **253**,  
441 v9–v17 (2006).
- 442 9. Fillatreau, S. *et al.* The astonishing diversity of Ig classes and B cell repertoires in teleost fish. *Frontiers*  
443 *in Immunology* **4**, 28 (2013).
- 444 10. Ravi, V. & Venkatesh, B. The divergent genomes of teleosts. *Annual Review of Animal Biosciences* **6**,  
445 47–68 (2018).
- 446 11. Danilova, N., Bussmann, J., Jekosch, K. & Steiner, L. A. The immunoglobulin heavy-chain locus in  
447 zebrafish: identification and expression of a previously unknown isotype, immunoglobulin Z. *Nature Im-*  
448 *munology* **6**, 295–302 (2005).
- 449 12. Magadán-Mompó, S., Sánchez-Espinel, C. & Gambón-Deza, F. Immunoglobulin heavy chains in medaka  
450 (*Oryzias latipes*). *BMC Evolutionary Biology* **11**, 165 (2011).
- 451 13. Bao, Y. *et al.* The immunoglobulin gene loci in the teleost *Gasterosteus aculeatus*. *Fish & Shellfish Im-*  
452 *munology* **28**, 40–48 (2010).
- 453 14. Gambón-Deza, F., Sánchez-Espinel, C. & Magadán-Mompó, S. Presence of an unique IgT on the IGH lo-  
454 cus in three-spined stickleback fish (*Gasterosteus aculeatus*) and the very recent generation of a repertoire  
455 of VH genes. *Developmental & Comparative Immunology* **34**, 114–122 (2010).

- 456 15. Hansen, J. D., Landis, E. D. & Phillips, R. B. Discovery of a unique Ig heavy-chain isotype (IgT) in  
457 rainbow trout: Implications for a distinctive B cell developmental pathway in teleost fish. *PNAS* **102**,  
458 6919–6924 (2005).
- 459 16. Savan, R. *et al.* Discovery of a new class of immunoglobulin heavy chain from fugu. *European Journal*  
460 *of Immunology* **35**, 3320–3331 (2005).
- 461 17. Yasuike, M. *et al.* Evolution of duplicated IgH loci in Atlantic salmon, *Salmo salar*. *BMC Genomics* **11**,  
462 486 (2010).
- 463 18. Bengtén, E. & Wilson, M. in *Pathogen-Host Interactions: Antigenic Variation V. Somatic Adaptations*  
464 (eds Hsu, E. & Du Pasquier, L.) 193–234 (Springer, 2015).
- 465 19. Hughes, L. C. *et al.* Comprehensive phylogeny of ray-finned fishes (Actinopterygii) based on transcrip-  
466 tomic and genomic data. *PNAS* **115**, 6249–6254 (2018).
- 467 20. Valenzano, D. R. *et al.* The African Turquoise Killifish Genome Provides Insights into Evolution and  
468 Genetic Architecture of Lifespan. *Cell* **163**, 1539–1554 (2015).
- 469 21. Reichwald, K. *et al.* Insights into Sex Chromosome Evolution and Aging from the Genome of a Short-  
470 Lived Fish. *Cell* **163**, 1527–1538 (2015).
- 471 22. Cellerino, A., Valenzano, D. R. & Reichard, M. From the bush to the bench: the annual *Nothobranchius*  
472 fishes as a new model system in biology. *Biological Reviews* **91**, 511–533 (2016).
- 473 23. Schartl, M. *et al.* The genome of the platyfish, *Xiphophorus maculatus*, provides insights into evolutionary  
474 adaptation and several complex traits. *Nature Genetics* **45**, 567–572 (2013).
- 475 24. Altschul, S. F. *et al.* Basic local alignment search tool. *Journal of Molecular Biology* **215**, 403–410 (1990).
- 476 25. Altschul, S. F. *et al.* Gapped BLAST and PSI-BLAST: a new generation of protein database search pro-  
477 grams. *Nucleic Acids Research* **25**, 3389–3402 (1997).
- 478 26. Bankevich, A. *et al.* SPAdes: A New Genome Assembly Algorithm and Its Applications to Single-Cell  
479 Sequencing. *Journal of Computational Biology* **19**, 455–477 (2012).
- 480 27. Boetzer, M. *et al.* Scaffolding pre-assembled contigs using SSPACE. *Bioinformatics* **27**, 578–579 (2011).
- 481 28. Sanger, F., Nicklen, S. & Coulson, A. R. DNA sequencing with chain-terminating inhibitors. *PNAS* **74**,  
482 5463–5467 (1977).
- 483 29. Bengtén, E. *et al.* Structure of the catfish IGH locus: analysis of the region including the single functional  
484 *IGHM* gene. *Immunogenetics* **58**, 831–844 (2006).
- 485 30. Ramirez-Gomez, F. *et al.* Discovery and Characterization of Secretory IgD in Rainbow Trout: Secretory  
486 IgD Is Produced through a Novel Splicing Mechanism. *The Journal of Immunology* **188**, 1341–1349  
487 (2012).
- 488 31. Zhang, Y.-A. *et al.* IgT, a primitive immunoglobulin class specialized in mucosal immunity. *Nature Im-*  
489 *munology* **11**, 827–835 (2010).
- 490 32. Xu, Z. *et al.* Teleost skin, an ancient mucosal surface that elicits gut-like immune responses. *PNAS* **110**,  
491 13097–13102 (2013).
- 492 33. Mashoof, S. & Criscitiello, M. F. Fish Immunoglobulins. *Biology* **5**, 45 (2016).
- 493 34. Dobin, A. *et al.* STAR: ultrafast universal RNA-seq aligner. *Bioinformatics* **29**, 15–21 (2013).



- 494 35. Löytynoja, A. in *Multiple Sequence Alignment Methods* (ed Russell, D. J.) 155–170 (Humana Press,  
495 2014).
- 496 36. Stamatakis, A. RAxML version 8: a tool for phylogenetic analysis and post-analysis of large phylogenies.  
497 *Bioinformatics* **30**, 1312–1313 (2014).
- 498 37. Magurran, A. E. *Evolutionary ecology: the Trinidadian guppy* (Oxford University Press, Oxford, 2005).
- 499 38. Reid, N. M. *et al.* The genomic landscape of rapid repeated evolutionary adaptation to toxic pollution in  
500 wild fish. *Science* **354**, 1305–1308 (2016).
- 501 39. Taylor, D. S. Twenty-four years in the mud: what have we learned about the natural history and ecology  
502 of the mangrove rivulus, *Kryptolebias marmoratus*? *Integrative and Comparative Biology* **52**, 724–736  
503 (2012).
- 504 40. Cui, R. *et al.* Relaxed selection limits lifespan by increasing mutation load. *Cell* **178**, 1–15 (2019).
- 505 41. Weinstein, J. A., Jiang, N., White, R. A. & Quake, S. R. High-Throughput Sequencing of the Zebrafish  
506 Antibody Repertoire. *Science* **324**, 807–810 (2009).
- 507 42. Georgiou, G. *et al.* The promise and challenge of high-throughput sequencing of the antibody repertoire.  
508 *Nature Biotechnology* **32**, 158–168 (2014).
- 509 43. Jiang, N. *et al.* Determinism and stochasticity during maturation of the zebrafish antibody repertoire.  
510 *PNAS* **108**, 5348–5353 (2011).
- 511 44. Willemsen, D., Cui, R., Reichard, M. & Valenzano, D. R. Genomics and population genetics in turquoise  
512 killifish reveal demography as driver for lifespan evolution (In preparation).
- 513 45. Bolger, A. M., Lohse, M. & Usadel, B. Trimmomatic: a flexible trimmer for Illumina sequence data.  
514 *Bioinformatics* **30**, 2114–2120 (2014).
- 515 46. Langmead, B. & Salzberg, S. L. Fast gapped-read alignment with Bowtie 2. *Nature Methods* **9**, 357–359  
516 (2012).
- 517 47. Marçais, G., Yorke, J. A. & Zimin, A. QuorUM: An Error Corrector for Illumina Reads. *PLOS One* **10**,  
518 e0130821 (2015).
- 519 48. Nikolenko, S. I., Korobeynikov, A. I. & Alekseyev, M. A. BayesHammer: Bayesian clustering for error  
520 correction in single-cell sequencing. *BMC Genomics* **14**, S7 (2013).
- 521 49. Untergasser, A. *et al.* Primer3—new capabilities and interfaces. *Nucleic Acids Research* **40**, e115 (2012).
- 522 50. Smith, A., Hubley, R. & Green, P. *RepeatMasker Open-4.0*. URL: <https://www.repeatmasker.org>  
523 (2018).
- 524 51. Li, H. *et al.* The Sequence Alignment/Map format and SAMtools. *Bioinformatics* **25**, 2078–2079 (2009).
- 525 52. Robinson, J. T. *et al.* Integrative genomics viewer. *Nature Biotechnology* **29**, 24–26 (2011).
- 526 53. Thorvaldsdóttir, H., Robinson, J. T. & Mesirov, J. P. Integrative Genomics Viewer (IGV): high-performance  
527 genomics data visualization and exploration. *Briefings in Bioinformatics* **14**, 178–192 (2013).
- 528 54. Hahne, F. & Ivanek, R. in *Statistical Genomics: Methods and Protocols* (eds Mathé, E. & Davis, S.) 335–  
529 351 (Springer, 2016).
- 530 55. Shapiro, M. B. & Senapathy, P. RNA splice junctions of different classes of eukaryotes: sequence statistics  
531 and functional implications in gene expression. *Nucleic Acids Research* **15**, 7155–7174 (1987).

- 532 56. Ulitsky, I. *et al.* Extensive alternative polyadenylation during zebrafish development. *Genome Research*  
533 **22**, 2054–2066 (2012).
- 534 57. Wheeler, T. J. & Eddy, S. R. nhmmer: DNA homology search with profile HMMs. *Bioinformatics* **29**,  
535 2487–2489 (2013).
- 536 58. Hesse, J. E., Lieber, M. R., Mizuuchi, K. & Gellert, M. V(D)J recombination: a functional definition of  
537 the joining signals. *Genes & Development* **3**, 1053–1061 (1989).
- 538 59. Ehrenmann, F. & Lefranc, M.-P. IMGT/DomainGapAlign: IMGT Standardized Analysis of Amino Acid  
539 Sequences of Variable, Constant, and Groove Domains (IG, TR, MH, IgSF, MhSF). *Cold Spring Harbor*  
540 *Protocols* **2011**, 737–749 (2011).
- 541 60. Lefranc, M.-P. *et al.* IMGT unique numbering for immunoglobulin and T cell receptor variable domains  
542 and Ig superfamily V-like domains. *Developmental & Comparative Immunology* **27**, 55–77 (2003).
- 543 61. Needleman, S. B. & Wunsch, C. D. A general method applicable to the search for similarities in the amino  
544 acid sequence of two proteins. *Journal of Molecular Biology* **48**, 443–453 (1970).
- 545 62. Pagès, H., Aboyoun, P., Gentleman, R. & DebRoy, S. *Biostrings: Efficient manipulation of biological*  
546 *strings*. R package. URL: <https://bioconductor.org/packages/release/bioc/html/biostrings.html>  
547 (2019).
- 548 63. Rice, P., Longden, I. & Bleasby, A. EMBOSS: The European Molecular Biology Open Software Suite.  
549 *Trends in Genetics* **16**, 276–277 (2000).
- 550 64. Yu, G., Lam, T. T.-Y., Zhu, H. & Guan, Y. Two methods for mapping and visualizing associated data on  
551 phylogeny using ggtree. *Molecular Biology and Evolution* **35**, 3041–3043 (2018).
- 552 65. Rambaut, A. *FigTree* version 1.4. URL: <https://tree.bio.ed.ac.uk/software/figtree/> (2018).
- 553 66. Wright, E. S. Using DECIPHER v2.0 to Analyze Big Biological Sequence Data in R. *The R Journal* **8**,  
554 352–359 (2016).
- 555 67. Smith, P. *et al.* Regulation of life span by the gut microbiota in the short-lived African turquoise killifish.  
556 *eLife* **6**, e27014 (2017).
- 557 68. *Pathogen-Host Interactions: Antigenic Variation V. Somatic Adaptations* (eds Hsu, E. & Du Pasquier, L.)  
558 (Springer, 2015).

559 **Supplementary figures**

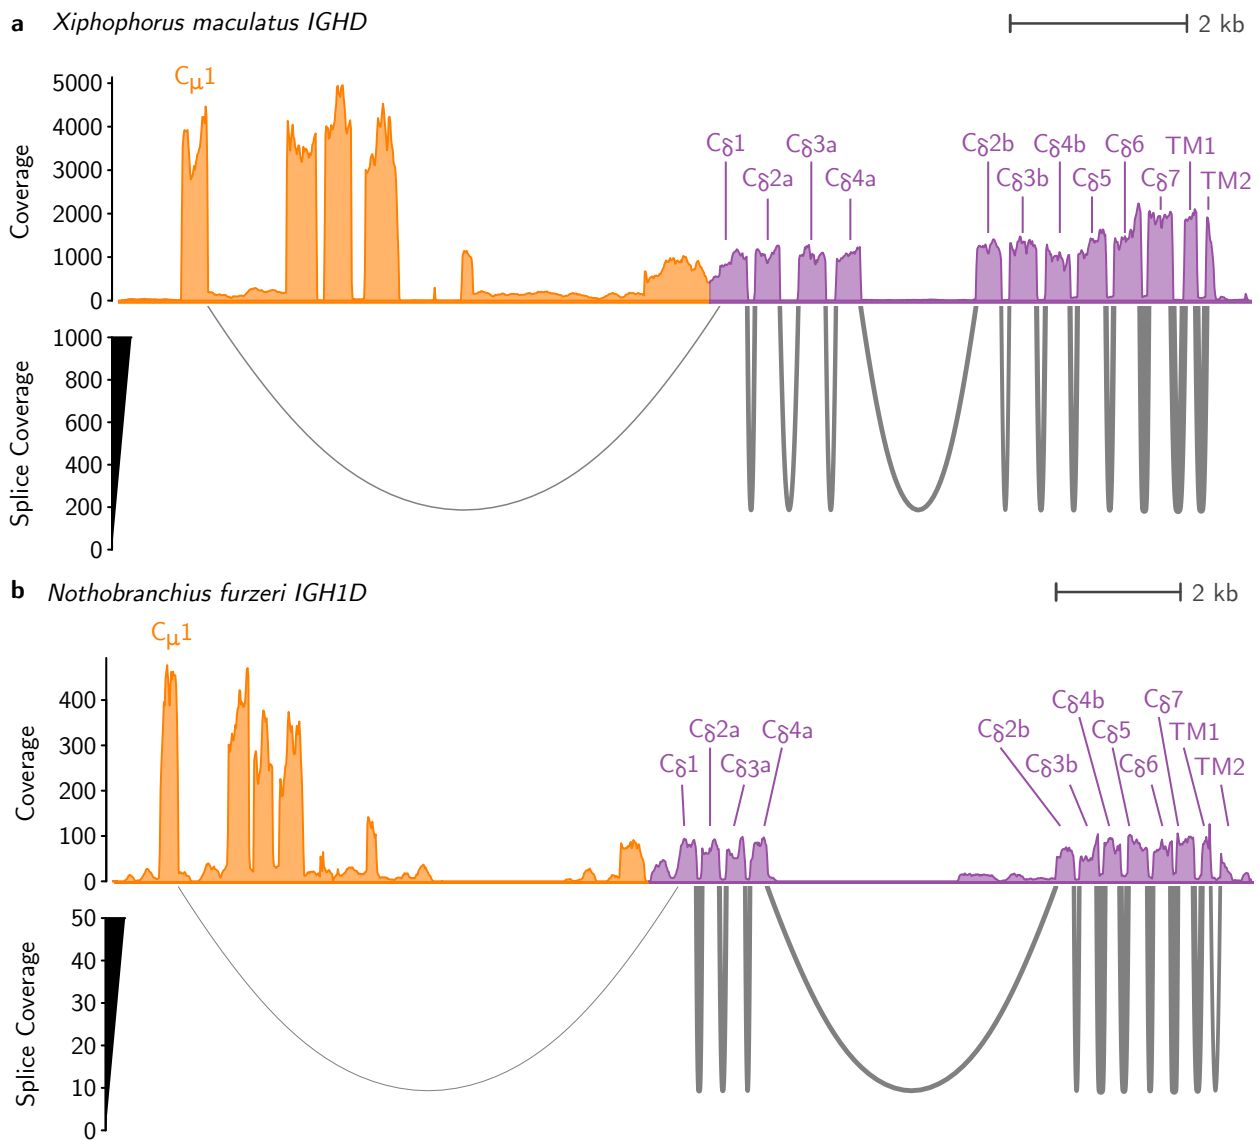

Figure S1: Read coverage and Sashimi plots showing alignment and splicing behaviour of RNA sequencing reads aligned to the IGHD constant regions of **a**, *Xiphophorus maculatus* and **b**, *Nothobranchius furzeri*, showing the chimeric splicing of C $\mu$ 1 to the start of the IGHD constant region in both species.

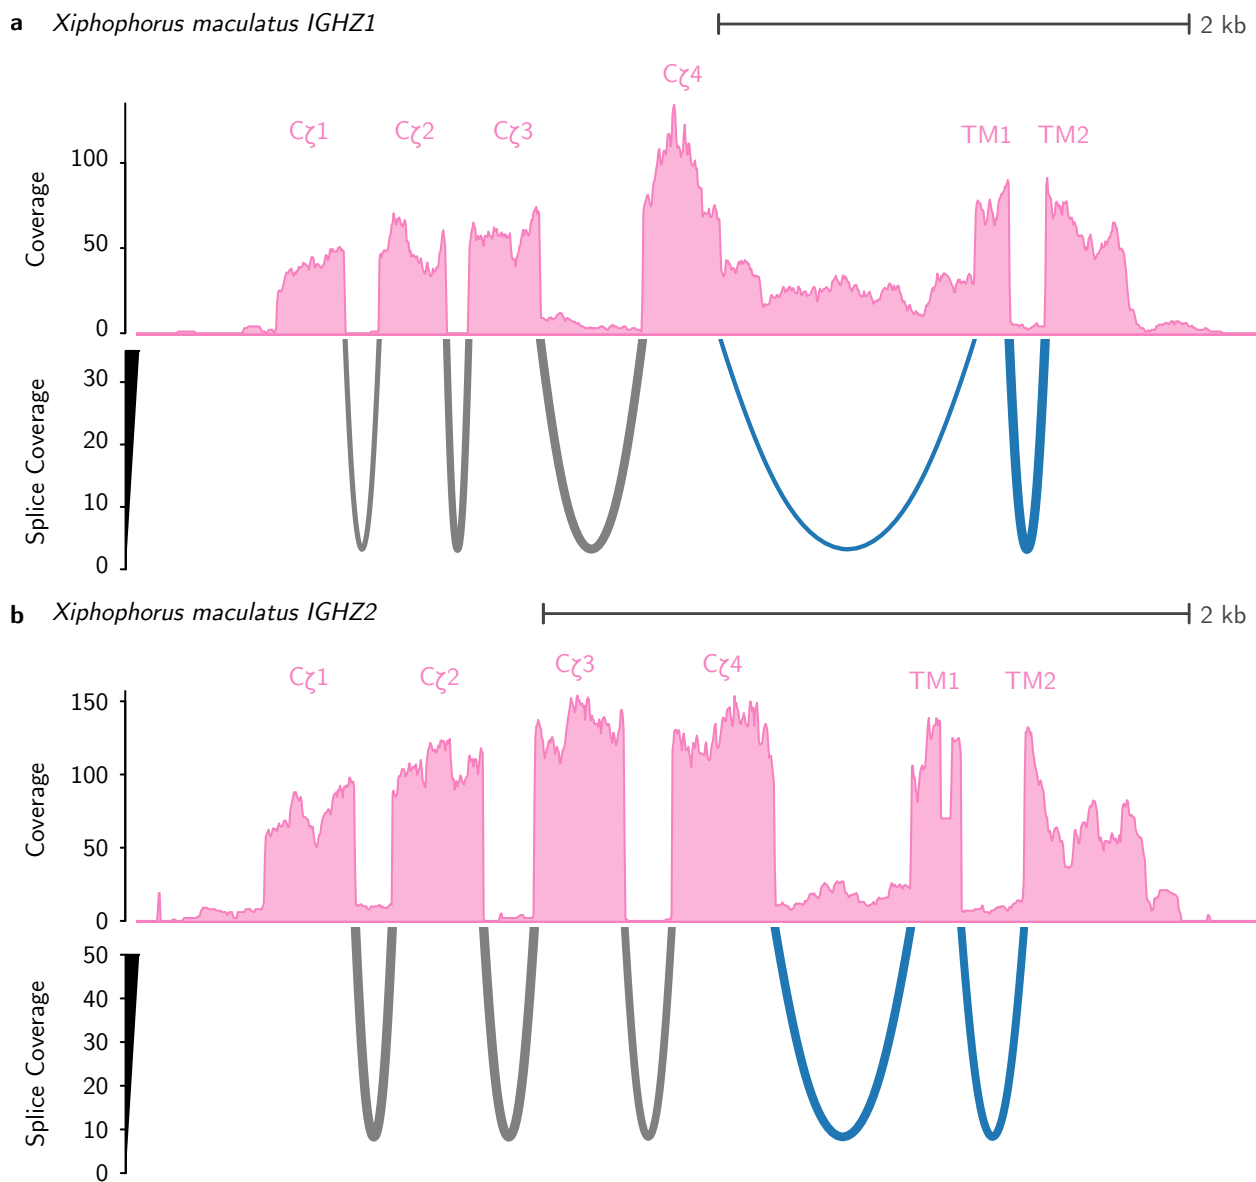

Figure S2: Read coverage and Sashimi plots showing alignment and splicing behaviour of RNA sequencing reads aligned to the (a) *IGHZ1* and (b) *IGHZ2* constant regions of *Xiphophorus maculatus*, showing the alternative splicing of secreted (grey) and transmembrane (grey+blue) isoforms in both cases. Note the apparent expression of a post-splice-site secretory tail after C $\zeta$ 4 in *IGHZ1* but not *IGHZ2*.

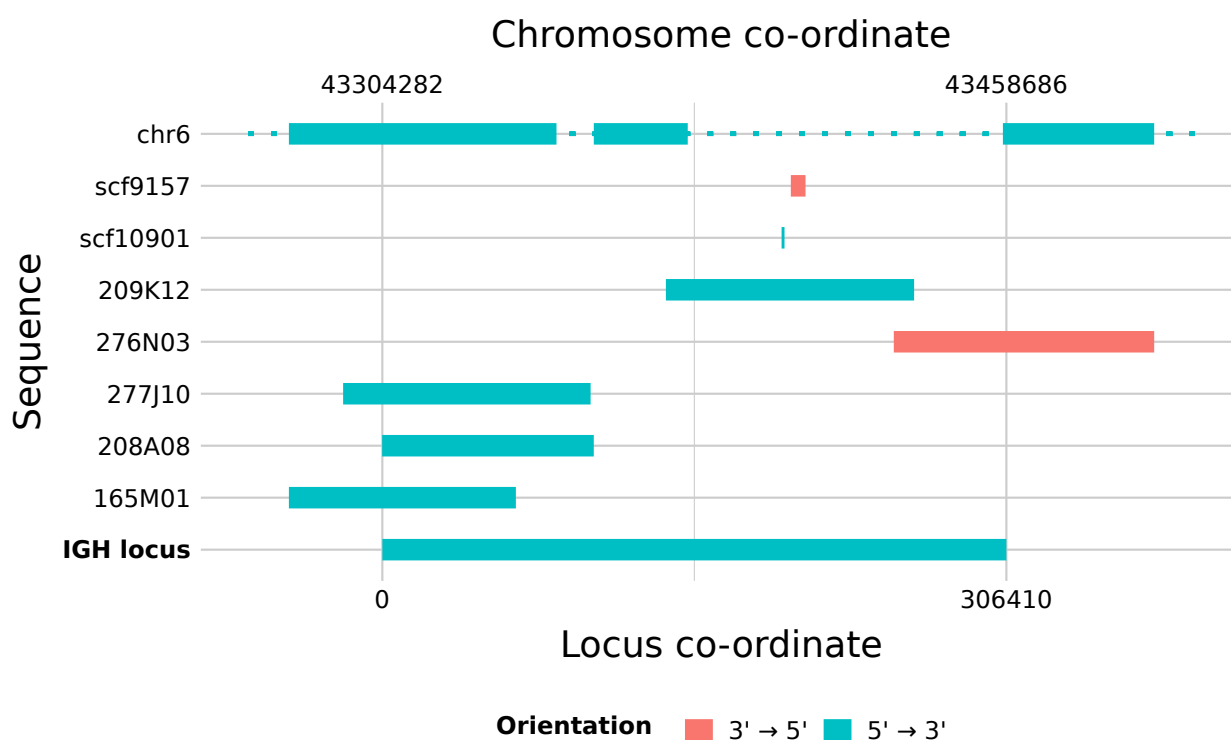

Figure S3: Assembling the *Nothobranchius furzeri* IGH locus: Schematic of genome scaffolds and BAC inserts contributing to the *Nothobranchius furzeri* IGH locus sequence, with their corresponding place within the locus sequence (bottom axis). Internal gaps with dotted lines indicate regions on chromosome 16 with no corresponding locus sequence, as a result of intercalation of BAC or scaffold sequences.

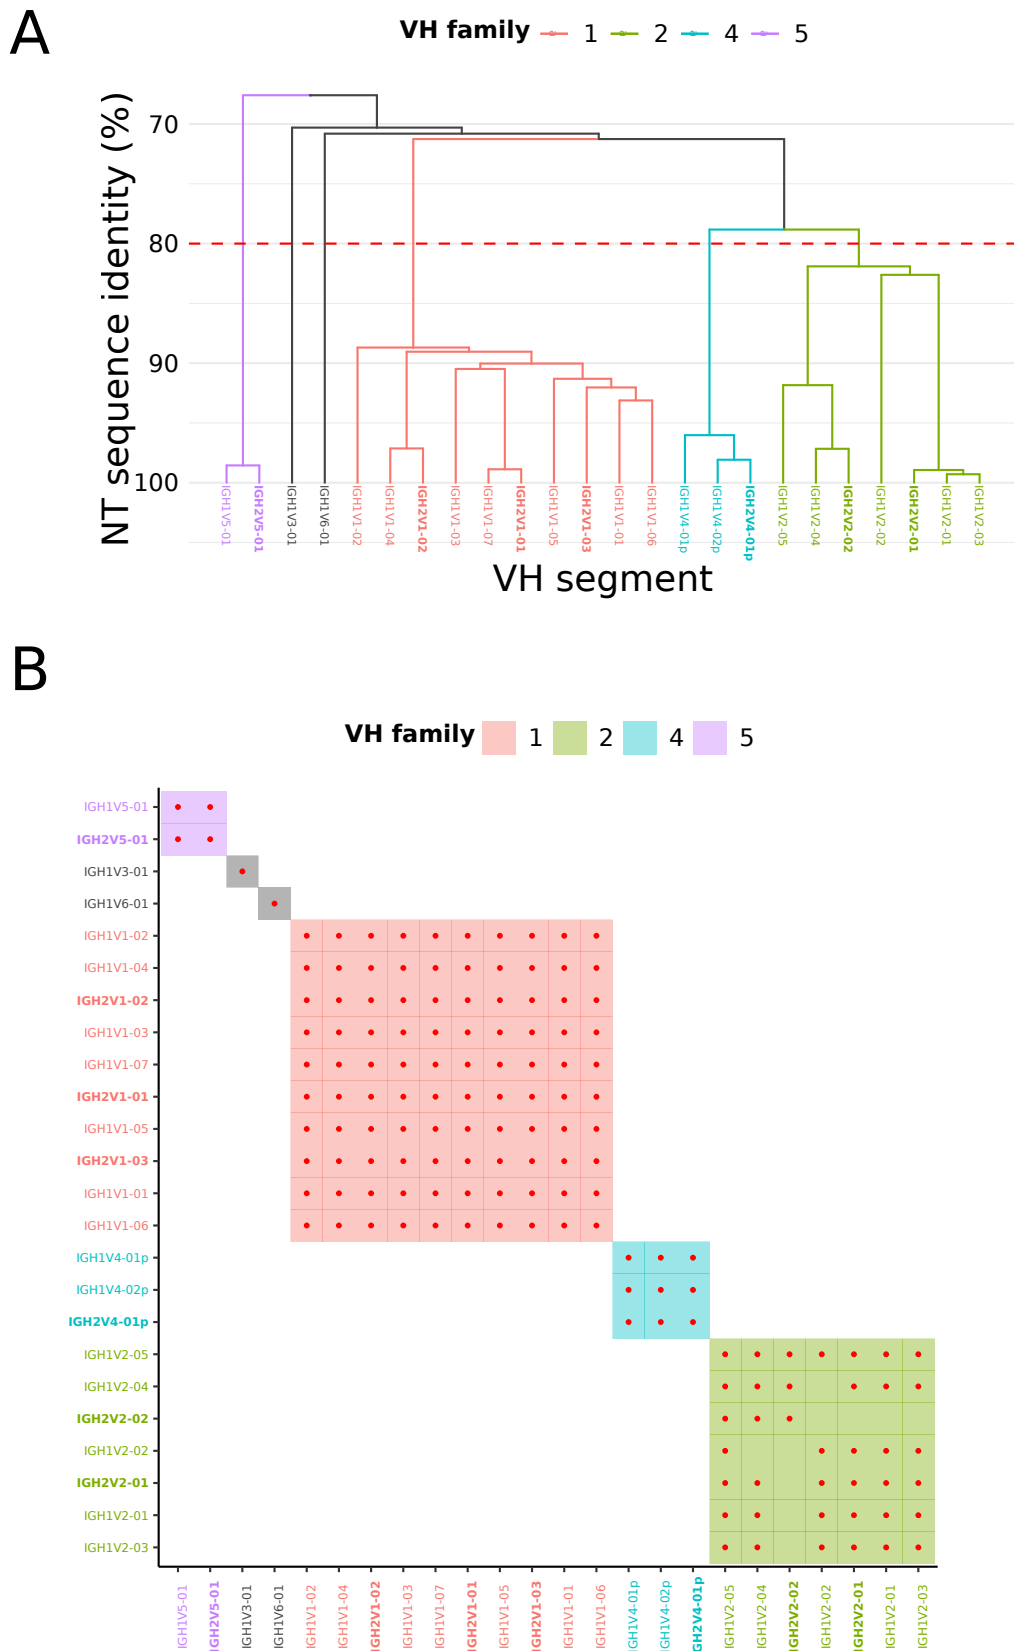

Figure S4: VH families in the *Nothobranchius furzeri* IGH locus: (A) Dendrogram of sequence similarity of VH segments in the *Nothobranchius furzeri* IGH locus, arranged by single-linkage clustering on nucleotide sequence identity. The red line indicates the 80% cutoff point for family assignment. (B) Heatmap of family relationships among *Nothobranchius furzeri* VH segments, with shaded squares indicating families and red dots indicating pairwise nucleotide sequence identity of at least 80%. In both subfigures, VH families containing multiple segments are uniquely coloured, single-segment families are in grey, and segments from the *IGH2* sublocus are displayed in boldface.

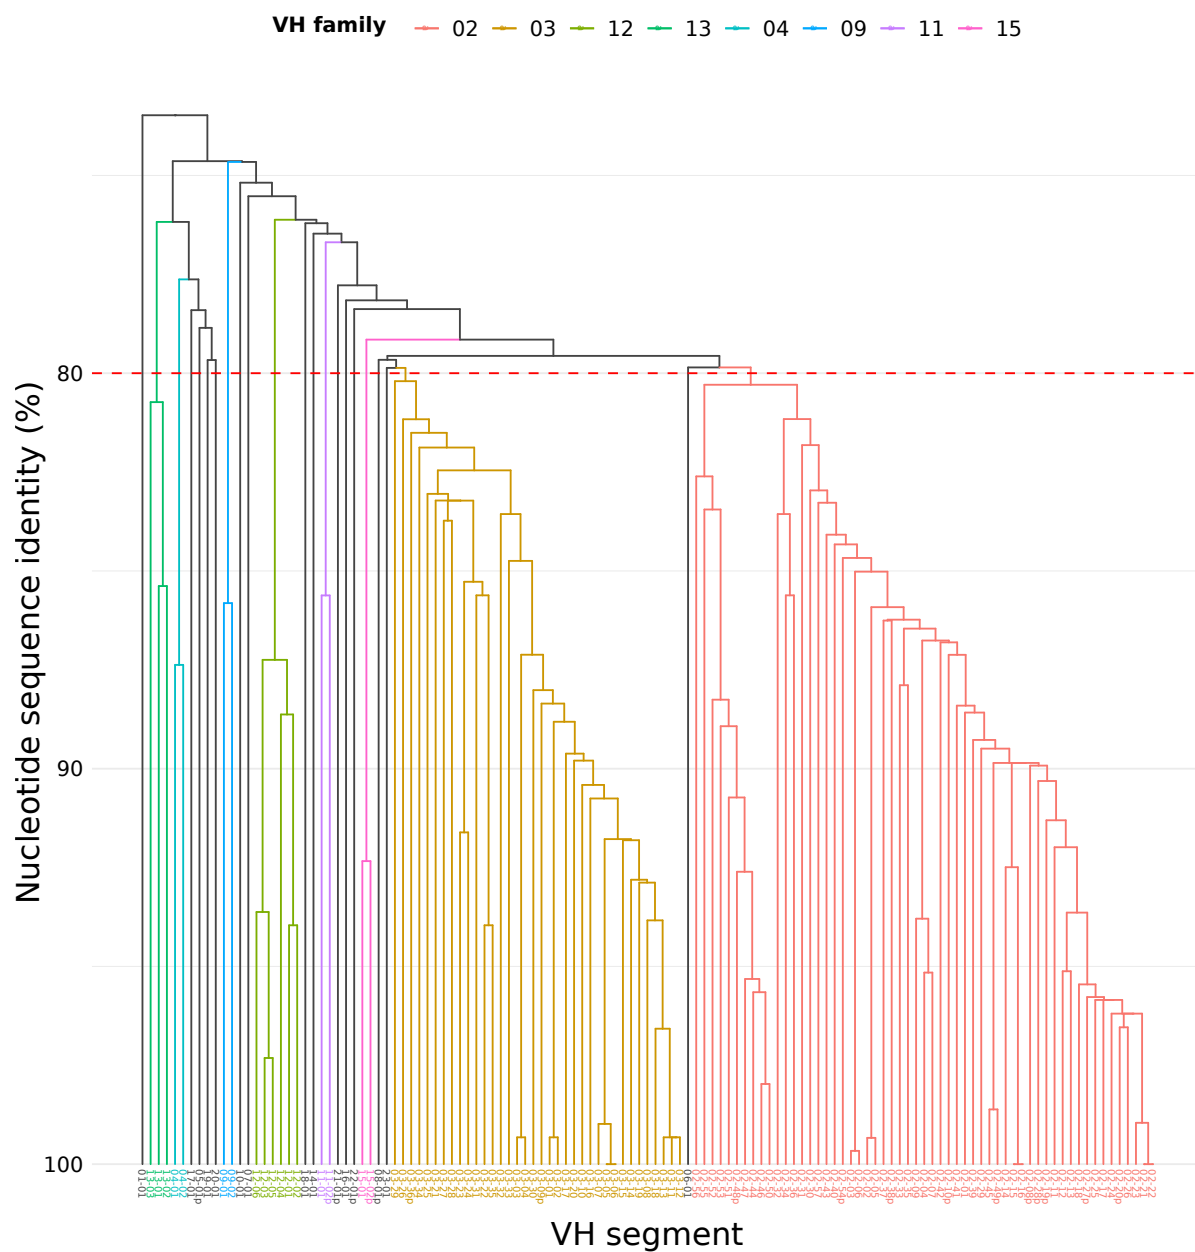

Figure S5: Dendrogram of VH families in the *Xiphophorus maculatus* IGH locus: Dendrogram of sequence similarity of VH segments in the *Xiphophorus maculatus* locus, arranged by single-linkage clustering on nucleotide sequence identity. The red line indicates the 80% cutoff point for family assignment, while branch colour indicates family membership: VH families containing multiple segments are uniquely coloured, while single-segment families are in grey.





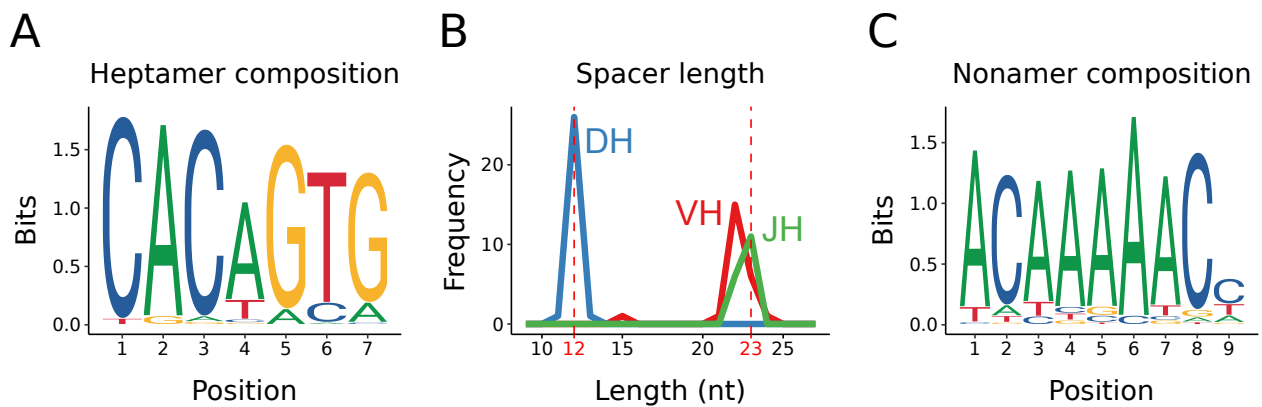

Figure S7: Recombination signal sequences in *Nothobranchius furzeri* IGH: (A) Sequence composition of conserved heptamer sequences across all *Nothobranchius furzeri* heavy-chain RSSs; (B) length distribution of unconserved spacer sequences in *Nothobranchius furzeri* heavy-chain RSSs; (C) sequence composition of conserved heptamer sequences across all *Nothobranchius furzeri* heavy-chain RSSs.

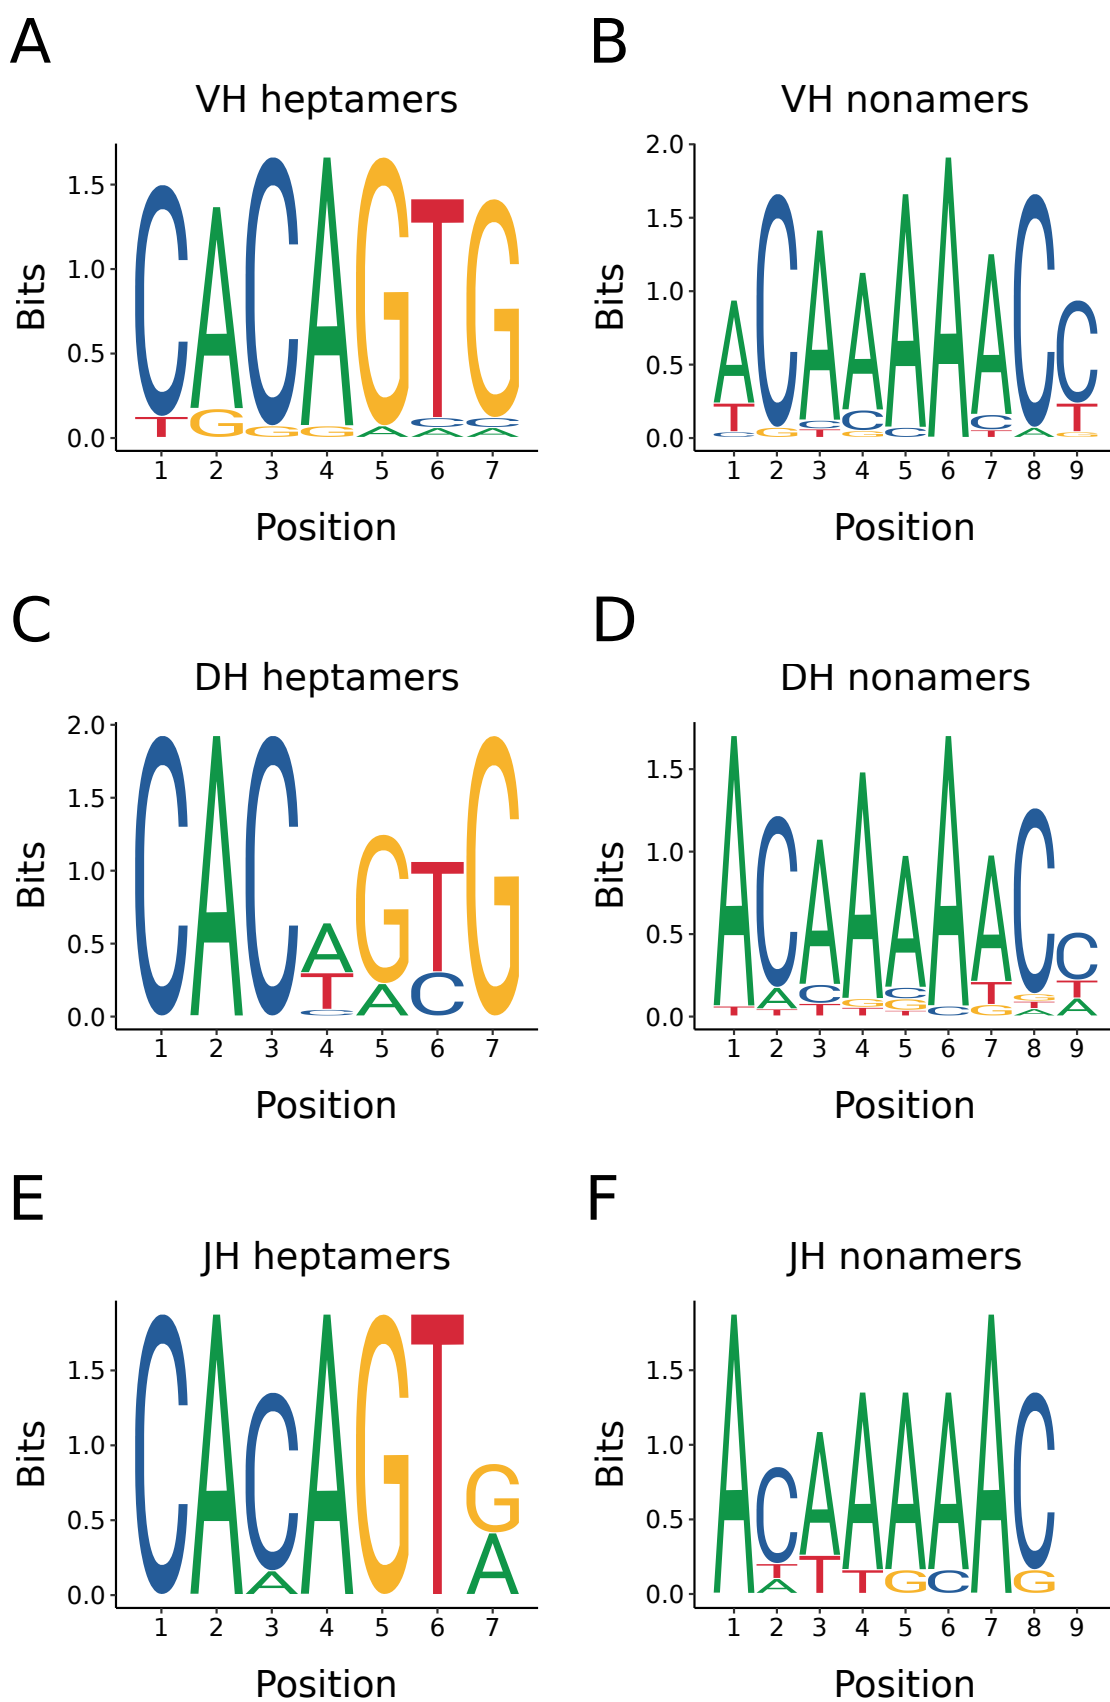

Figure S8: *Nothobranchius furzeri* recombination signal sequences by segment type: Sequence composition of conserved heptamer (A,C,E) and nonamer (B,D,F) sequences from *Nothobranchius furzeri* heavy-chain RSSs associated with VH (A,B), DH (C,D) or JH (E,F) gene segments.

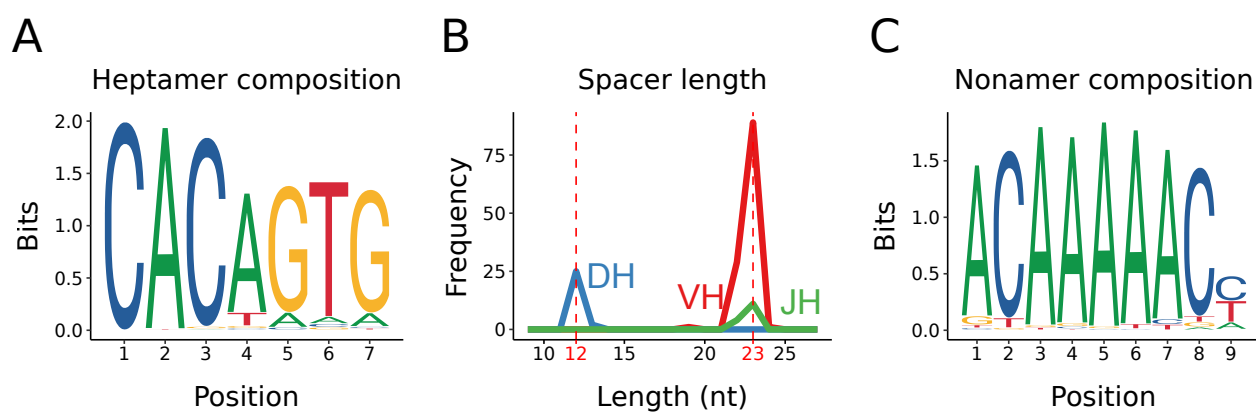

Figure S9: Recombination signal sequences in the *Xiphophorus maculatus* IGH locus: (A) Sequence composition of conserved heptamer sequences across all *Xiphophorus maculatus* heavy-chain RSSs; (B) length distribution of unconserved spacer sequences in *Xiphophorus maculatus* heavy-chain RSSs; (C) sequence composition of conserved heptamer sequences across all *Xiphophorus maculatus* heavy-chain RSSs.

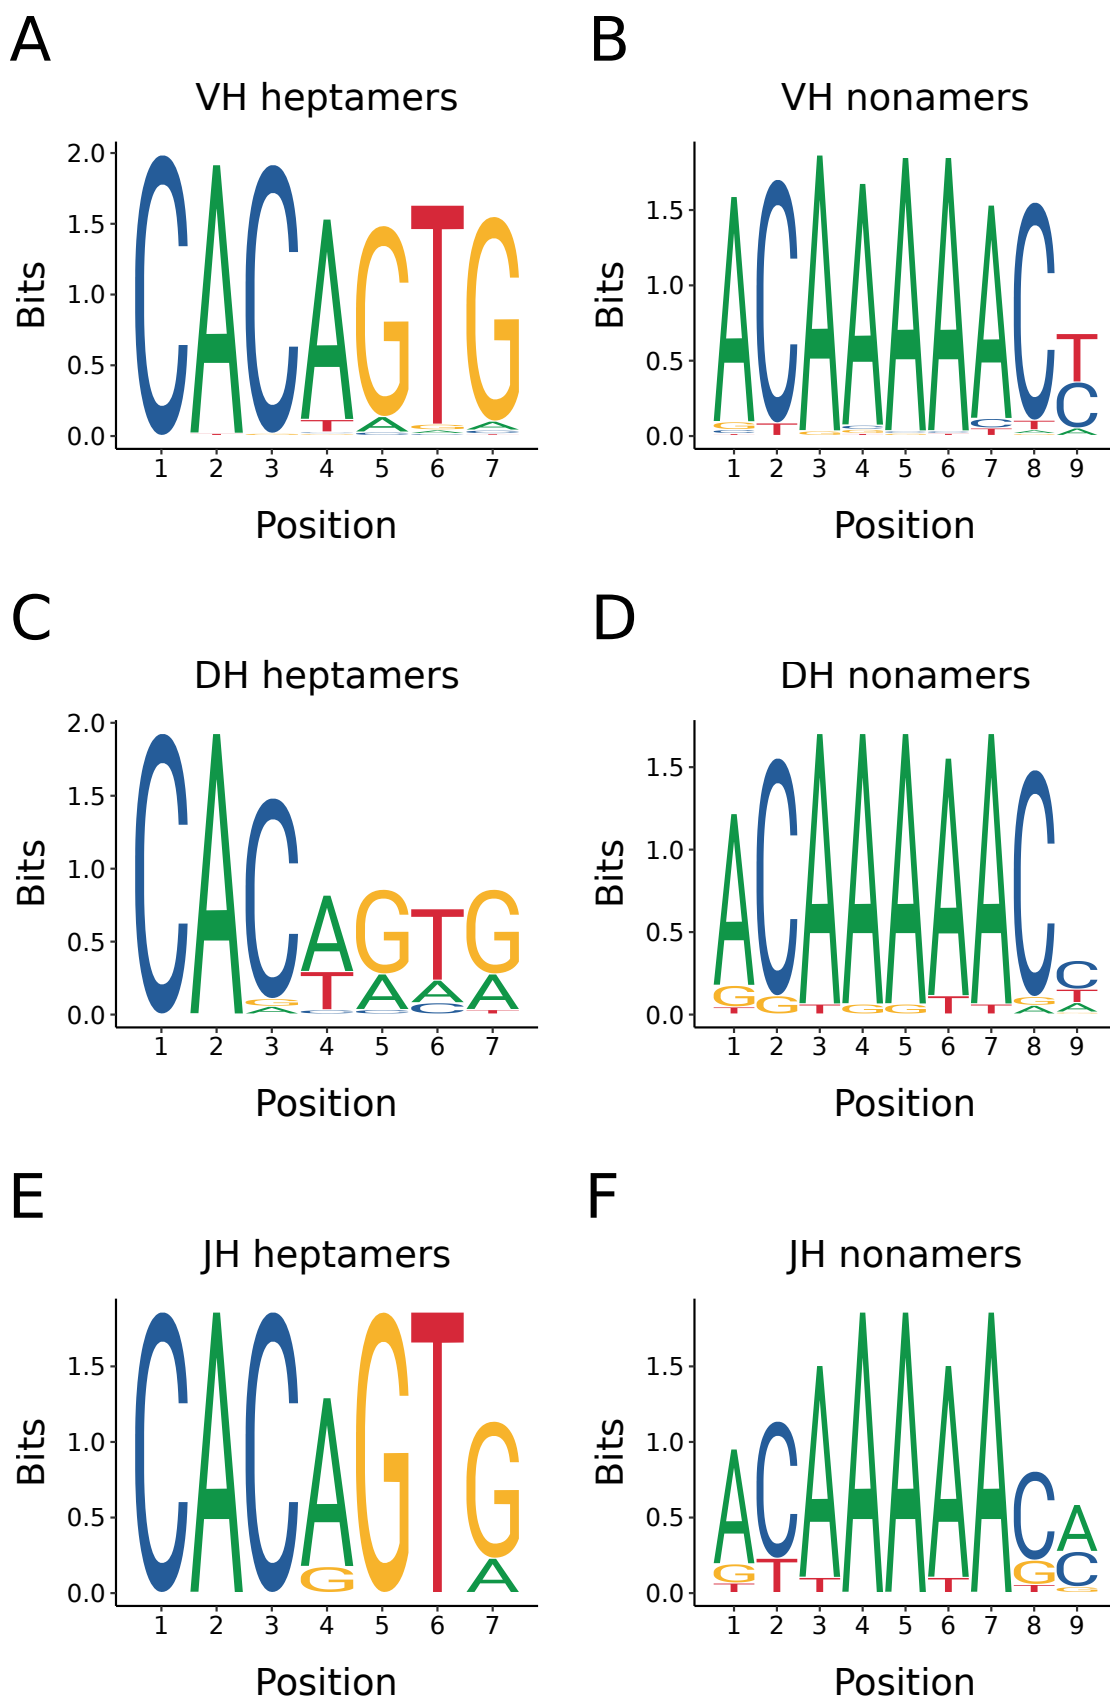

Figure S10: *Xiphophorus maculatus* recombination signal sequences by segment type: Sequence composition of conserved heptamer (A,C,E) and nonamer (B,D,F) sequences from *X. maculatus* heavy-chain RSSs associated with VH (A,B), DH (C,D) or JH (E,F) gene segments.

560 **Supplementary tables**

Table S1: Versions of software and R packages used in computational analyses

| Program            | Version      |
|--------------------|--------------|
| ape                | 5.2          |
| Basemount          | 0.15.96.2154 |
| Biostrings         | 2.50.1       |
| BLAST              | 2.7.1        |
| Bowtie 2           | 2.2.6        |
| BSgenome           | 1.50.0       |
| DECIPHER           | 2.10.0       |
| EMBOSS (FUZZNUC)   | 6.6.0        |
| FigTree            | 1.4.2        |
| HMMER              | 3.2          |
| GenomicRanges      | 1.34.0       |
| ggtree             | 1.14.4       |
| ggseqlogo          | 0.1          |
| Gviz               | 1.27.6       |
| IGV                | 2.3.68       |
| IMG/DomainGapAlign | 4.9.2        |
| PRANK              | v.170427     |
| Primer3            | 2.3.6        |
| QuorUM             | 1.0.0        |
| R                  | 3.5.2        |
| RAxML              | 8.2.12       |
| RepeatMasker       | 4.0.6        |
| SAMtools           | 1.9          |
| sed                | 4.2.2        |
| seqtk              | 1.3          |
| Snakemake          | 5.3.0        |
| SPAdes             | 3.6.1        |
| SSPACE             | 3.0          |
| STAR               | 2.5.2b       |
| tidytree           | 0.2.0        |
| tidyverse          | 1.2.1        |
| Trimmomatic        | 0.32         |

| <b>Genus</b>          | <b>Species</b>      | <b>Common Name</b>  | <b>GenBank Assembly Accession</b> |
|-----------------------|---------------------|---------------------|-----------------------------------|
| <i>Nothobranchius</i> | <i>furzeri</i>      | Turquoise killifish | NA <sup>a</sup>                   |
| <i>Xiphophorus</i>    | <i>maculatus</i>    | Southern platyfish  | GCA_002775205.2                   |
| <i>Austrofundulus</i> | <i>limnaeus</i>     | –                   | GCA_001266775.1                   |
| <i>Fundulus</i>       | <i>heteroclitus</i> | Mummichog           | GCA_000826765.1                   |
| <i>Poecilia</i>       | <i>formosa</i>      | Amazon molly        | GCA_000485575.1                   |
| <i>Poecilia</i>       | <i>reticulata</i>   | Guppy               | GCA_000633615.1                   |
| <i>Cyprinodon</i>     | <i>variegatus</i>   | Sheepshead minnow   | GCA_000732505.1                   |
| <i>Kryptolebias</i>   | <i>marmoratus</i>   | Mangrove rivulus    | GCA_001649575.1                   |
| <i>Aphyosemion</i>    | <i>australe</i>     | Lyretail panchax    | GCA_006937985.1                   |
| <i>Callopanchax</i>   | <i>toddi</i>        | –                   | GCA_006937965.1                   |
| <i>Pachypanchax</i>   | <i>playfairii</i>   | Golden panchax      | GCA_006937955.1                   |
| <i>Nothobranchius</i> | <i>orthonotus</i>   | Spotted killifish   | GCA_006942095.1                   |
| <i>Oryzias</i>        | <i>latipes</i>      | Medaka              | GCA_002234675.1                   |

<sup>a</sup> Willemsen *et al.*<sup>44</sup>

Table S2: Genome assemblies used to identify *IGH* locus sequences in cyprinodontiform fishes

Table S3: RNA-sequencing datasets used for *IGH* locus characterisation

| Species              | <i>N. furzeri</i> | <i>X. maculatus</i>              |
|----------------------|-------------------|----------------------------------|
| Tissues              | Gut               | Various <sup>a</sup>             |
| BioProject Accession | PRJNA379208       | PRJNA420092                      |
| SRA Run Accessions   | SRR5344350        | SRR6327069                       |
|                      | SRR5344343        | SRR6327070                       |
|                      | SRR5344344        | SRR6327071                       |
|                      | SRR5344345        | SRR6327072                       |
|                      | SRR5344346        | SRR6327073                       |
|                      | SRR5344347        | SRR6327074                       |
|                      | SRR5344348        | SRR6327075                       |
|                      | SRR5344349        | SRR6327076                       |
|                      | SRR5344350        | SRR6327077                       |
|                      |                   | SRR6327078                       |
|                      |                   | SRR6327079                       |
|                      |                   | SRR6327080                       |
|                      |                   | SRR6327081                       |
|                      |                   | SRR6327082                       |
|                      |                   | SRR6327083                       |
|                      |                   | SRR6327084                       |
|                      |                   | SRR6327085                       |
|                      |                   | SRR6327086                       |
|                      |                   | SRR6327087                       |
|                      |                   | SRR6327088                       |
|                      | SRR6327089        |                                  |
|                      | SRR6327090        |                                  |
|                      | SRR6327091        |                                  |
|                      | SRR6327092        |                                  |
|                      | SRR6327093        |                                  |
|                      | SRR6327094        |                                  |
| Source               | 67                | Citation not given in BioProject |

<sup>a</sup> Tissues used for *X. maculatus* RNA-sequencing included brain, heart, liver, gut, skin or whole fish; see BioProject entry for details.

Table S4: Co-ordinate table of constant-region exons in the *N. furzeri* IGH locus

| Name      | Isotype | Start  | End    | Length | Strand |
|-----------|---------|--------|--------|--------|--------|
| IGH1M-1   | M       | 130848 | 131144 | 297    | +      |
| IGH1M-2   | M       | 131971 | 132312 | 342    | +      |
| IGH1M-3   | M       | 132394 | 132705 | 312    | +      |
| IGH1M-4   | M       | 132816 | 133288 | 473    | +      |
| IGH1M-TM1 | M       | 134262 | 134413 | 152    | +      |
| IGH1M-TM2 | M       | 138431 | 138819 | 389    | +      |
| IGH1D-1   | D       | 139381 | 139689 | 309    | +      |
| IGH1D-2A  | D       | 139774 | 140064 | 291    | +      |
| IGH1D-3A  | D       | 140178 | 140489 | 312    | +      |
| IGH1D-4A  | D       | 140572 | 140853 | 282    | +      |
| IGH1D-2B  | D       | 145613 | 145909 | 297    | +      |
| IGH1D-3B  | D       | 146000 | 146311 | 312    | +      |
| IGH1D-4B  | D       | 146398 | 146676 | 279    | +      |
| IGH1D-5   | D       | 146795 | 147124 | 330    | +      |
| IGH1D-6   | D       | 147210 | 147527 | 318    | +      |
| IGH1D-7   | D       | 147598 | 147885 | 288    | +      |
| IGH1D-TM1 | D       | 148016 | 148164 | 149    | +      |
| IGH1D-TM2 | D       | 148323 | 148504 | 182    | +      |
| IGH2D-TM2 | D       | 187624 | 187803 | 180    | -      |
| IGH2D-TM1 | D       | 187963 | 188111 | 149    | -      |
| IGH2D-7   | D       | 188658 | 188945 | 288    | -      |
| IGH2D-6   | D       | 189016 | 189333 | 318    | -      |
| IGH2D-5   | D       | 189419 | 189748 | 330    | -      |
| IGH2D-4B  | D       | 189867 | 190145 | 279    | -      |
| IGH2D-3B  | D       | 190232 | 190543 | 312    | -      |
| IGH2D-2B  | D       | 190636 | 190932 | 297    | -      |
| IGH2D-4A  | D       | 195644 | 195925 | 282    | -      |
| IGH2D-3A  | D       | 196008 | 196319 | 312    | -      |
| IGH2D-2A  | D       | 196433 | 196723 | 291    | -      |
| IGH2D-1   | D       | 196808 | 197116 | 309    | -      |
| IGH2M-TM2 | M       | 198315 | 198506 | 192    | -      |
| IGH2M-TM1 | M       | 199834 | 199985 | 152    | -      |
| IGH2M-4   | M       | 200953 | 201425 | 473    | -      |
| IGH2M-3   | M       | 201536 | 201847 | 312    | -      |
| IGH2M-2   | M       | 201929 | 202270 | 342    | -      |
| IGH2M-1   | M       | 203549 | 203845 | 297    | -      |



| Name       | Start  | End    | Length | Strand | RSS Start | Heptamer | Spacer Length | Nonamer    | RSS End | RSS Length | Comment           |
|------------|--------|--------|--------|--------|-----------|----------|---------------|------------|---------|------------|-------------------|
| IGH1V1-01  | 1252   | 1540   | 289    | +      | 1541      | CACAGTG  | 22            | ACAAAAACC  | 1578    | 38         |                   |
| IGH1V1-02  | 3365   | 3656   | 292    | +      | 3657      | CACAGTG  | 22            | ACAAAAACC  | 3694    | 38         |                   |
| IGH1V2-01  | 5907   | 6201   | 295    | +      | 6202      | CACAGAA  | 15            | ACAAAAACT  | 6232    | 31         |                   |
| IGH1V1-03  | 13690  | 13964  | 275    | +      | 13965     | CACAGTG  | 22            | ACAAAAACC  | 14002   | 38         |                   |
| IGH1V3-01  | 14862  | 15162  | 301    | +      | 15163     | CACAGTG  | 23            | ACAAAAACC  | 15201   | 39         |                   |
| IGH1V2-02  | 17433  | 17730  | 298    | +      | 17731     | CACAATG  | 23            | ACAAAAACC  | 17769   | 39         |                   |
| IGH1V4-01p | 24566  | 24837  | 272    | +      | 24838     | CGCAGTG  | 22            | CCACAAACC  | 24875   | 38         | Nonsense mutation |
| IGH1V1-04  | 37305  | 37596  | 292    | +      | 37597     | CACAGTG  | 22            | ACAAAAACC  | 37634   | 38         |                   |
| IGH1V2-03  | 48845  | 49139  | 295    | +      | 49140     | CACAGTG  | 23            | TCAAAAAACT | 49178   | 39         |                   |
| IGH1V1-05  | 49909  | 50197  | 289    | +      | 50198     | CACAGTG  | 22            | ACAAAAACC  | 50235   | 38         |                   |
| IGH1V5-01  | 51710  | 51998  | 289    | +      | 51999     | CACAGTG  | 22            | ACAAAAACC  | 52036   | 38         |                   |
| IGH1V2-04  | 56322  | 56616  | 295    | +      | 56617     | CACAGTG  | 23            | ACAAAAACC  | 56655   | 39         |                   |
| IGH1V6-01  | 57465  | 57762  | 298    | +      | 57763     | CACAGTG  | 21            | ACTAAATCT  | 57799   | 37         |                   |
| IGH1V1-06  | 59678  | 59966  | 289    | +      | 59967     | CACAGTG  | 22            | ACAAAAACC  | 60004   | 38         |                   |
| IGH1V4-02p | 68017  | 68288  | 272    | +      | 68289     | TGCAGTG  | 22            | TCACAAACC  | 68326   | 38         | Nonsense mutation |
| IGH1V2-05  | 69787  | 70084  | 298    | +      | 70085     | CACAGTG  | 23            | ACAAAAACC  | 70123   | 39         |                   |
| IGH1V1-07  | 155485 | 155763 | 279    | +      | 155764    | CACAGTG  | 22            | TCAAAAACC  | 155801  | 38         |                   |
| IGH2V2-02  | 282620 | 282914 | 295    | -      | 282915    | CACAGTG  | 23            | ACAAAAACC  | 282953  | 39         |                   |
| IGH2V4-01p | 284404 | 284675 | 272    | -      | 284676    | TGCAGTG  | 22            | TCACAAACC  | 284713  | 38         | Nonsense mutation |
| IGH2V5-01  | 288808 | 289096 | 289    | -      | 289097    | CACAGTG  | 22            | ACAGAAACT  | 289134  | 38         |                   |
| IGH2V1-03  | 289977 | 290271 | 295    | -      | 290272    | CACAGTG  | 22            | ACAAAAACC  | 290309  | 38         |                   |
| IGH2V1-02  | 293835 | 294126 | 292    | -      | 294127    | CACAGTG  | 22            | ACAAAAACC  | 294164  | 38         |                   |
| IGH2V2-01  | 303780 | 304074 | 295    | -      | 304075    | CAGGGCC  | 24            | AGCACAAAG  | 304114  | 40         |                   |
| IGH2V1-01  | 304926 | 305204 | 279    | -      | 305205    | CACAGTG  | 22            | TCAAAACCC  | 305242  | 38         |                   |

Table S5: Co-ordinate table of VH segments in the *N. furzeri* IGH locus

563

Table S6: Co-ordinate table of DH segments in the *N. furzeri* IGH locus

| Name    | Start  | NT Sequence                | End    | Length | Strand |
|---------|--------|----------------------------|--------|--------|--------|
| IGH1D01 | 25782  | ATACGTACTTTCGTGGTATATAGAGA | 25807  | 26     | +      |
| IGH1D02 | 76700  | GATATCTGGGTGGGGG           | 76715  | 16     | +      |
| IGH1D03 | 77027  | TGAAATGATTAC               | 77038  | 12     | +      |
| IGH1D04 | 77476  | TCGCGTAGCGGC               | 77487  | 12     | +      |
| IGH1D05 | 78717  | GAAACCACGGCAGC             | 78730  | 14     | +      |
| IGH1D06 | 79049  | TTTATAGCGGCTAC             | 79062  | 14     | +      |
| IGH1D07 | 80417  | CAGACTGGAGA                | 80427  | 11     | +      |
| IGH1D08 | 81362  | TTCATGGCAGCCAC             | 81375  | 14     | +      |
| IGH1D09 | 82067  | CAGACTGGAGC                | 82077  | 11     | +      |
| IGH1D10 | 84282  | TGGGGTGGCAGC               | 84293  | 12     | +      |
| IGH2D04 | 263497 | CAGACTGGAGA                | 263507 | 11     | -      |
| IGH2D03 | 270243 | TTTATAGCGGCTAC             | 270256 | 14     | -      |
| IGH2D02 | 270878 | GAAACCACGGCAGC             | 270891 | 14     | -      |
| IGH2D01 | 271749 | GACTTTTACTAC               | 271760 | 12     | -      |

564

565

Table S7: Co-ordinate table of DH 5'-RSSs in the *N. furzeri* IGH locus

| Name    | 5'-RSS Start | Nonamer   | Spacer Length | Heptamer | 5'-RSS End | Length |
|---------|--------------|-----------|---------------|----------|------------|--------|
| IGH1D01 | 25754        | GGTTGTTGT | 12            | CACTGTG  | 25781      | 28     |
| IGH1D02 | 76672        | AGTTTTTGA | 12            | CACAGTG  | 76699      | 28     |
| IGH1D03 | 76999        | TGTTGTTGT | 12            | CACAGTG  | 77026      | 28     |
| IGH1D04 | 77448        | AGTTTTTGT | 12            | CACGGTG  | 77475      | 28     |
| IGH1D05 | 78688        | GATGTTTTT | 13            | CACAGTG  | 78716      | 29     |
| IGH1D06 | 79021        | TGTTTTTGT | 12            | CGCTGTG  | 79048      | 28     |
| IGH1D07 | 80389        | AGTTTGGT  | 12            | CACAGTG  | 80416      | 28     |
| IGH1D08 | 81334        | TGTTTTTGT | 12            | CGCTGTG  | 81361      | 28     |
| IGH1D09 | 82039        | AGTTTGGT  | 12            | CACAGTG  | 82066      | 28     |
| IGH1D10 | 84254        | TCATTCATT | 12            | CACTGTG  | 84281      | 28     |
| IGH2D04 | 263469       | AGTTTGGT  | 12            | CACAGTG  | 263496     | 28     |
| IGH2D03 | 270215       | TGTTTTTGT | 12            | CGCTGTG  | 270242     | 28     |
| IGH2D02 | 270850       | TGTTTTTGT | 12            | CACAGTG  | 270877     | 28     |
| IGH2D01 | 271721       | AGTTTTTAT | 12            | CATGGTG  | 271748     | 28     |

566

567

Table S8: Co-ordinate table of DH 3'-RSSs in the *N. furzeri* IGH locus

| Name    | 3'-RSS Start | Heptamer | Spacer Length | Nonamer   | 3'-RSS End | Length |
|---------|--------------|----------|---------------|-----------|------------|--------|
| IGH1D01 | 25808        | CACAGTG  | 12            | ACAAAAACC | 25835      | 28     |
| IGH1D02 | 76716        | CACAGTG  | 12            | ACAAAAACC | 76743      | 28     |
| IGH1D03 | 77039        | CACTGTG  | 11            | AATATAACC | 77065      | 27     |
| IGH1D04 | 77488        | CACAGCG  | 12            | ACATAAAAC | 77515      | 28     |
| IGH1D05 | 78731        | CACAGCG  | 12            | ACAAAAGCC | 78758      | 28     |
| IGH1D06 | 79063        | CACTGTG  | 12            | ACAAGATCC | 79090      | 28     |
| IGH1D07 | 80428        | CACAACG  | 12            | ACAAAAACC | 80455      | 28     |
| IGH1D08 | 81376        | CACTGTG  | 12            | ACAAAATCC | 81403      | 28     |
| IGH1D09 | 82078        | CACAATG  | 12            | ACAAAAACC | 82105      | 28     |
| IGH1D10 | 84294        | CACAGTG  | 12            | ACAAAAACC | 84321      | 28     |
| IGH2D04 | 263508       | CACAACG  | 12            | ACAAAAACC | 263535     | 28     |
| IGH2D03 | 270257       | CACTGTG  | 12            | ACAAGATCC | 270284     | 28     |
| IGH2D02 | 270892       | CACAGCG  | 12            | ACAAAAGCC | 270919     | 28     |
| IGH2D01 | 271761       | CACAATG  | 12            | ACAAAAACC | 271788     | 28     |

568

| Name    | Start  | NT Sequence                                               | AA Sequence        | End    | Length | Strand |
|---------|--------|-----------------------------------------------------------|--------------------|--------|--------|--------|
| IGH1J01 | 26187  | GTGCTTTAGACAACCTGGGGAAAAGGAACCGGAGGTACTTACTTCAACCTG       | ALDNWKGTEVTVQP     | 26234  | 48     | +      |
| IGH1J02 | 128176 | ATGACTACTTTGACTACTGGGGAAAAGGAACAATGGTGACGGTCACATCAG       | DYFDYWGKGTMTVTVTS  | 128226 | 51     | +      |
| IGH1J03 | 128354 | ACCGTGGGGTAAAGGGACAACAGTCACGGTCAAAAACAG                   | PWKGTTTVTKT        | 128391 | 38     | +      |
| IGH1J04 | 128533 | ACGGTGTCTTTGACTACTGGGGTAAAGGACCGCAGTCACTGTAACATCAG        | GALDYWGKGTAVTVTS   | 128583 | 51     | +      |
| IGH1J05 | 128887 | ACAACGCTTTTGGACTACTGGGGAAAAGGACAACAGGTACCGTCACTTACAG      | NAFDYWGKGTAVTVTS   | 128937 | 51     | +      |
| IGH1J06 | 129346 | CTACGATGCTTTTGGACTACTGGGGAAAAGGACAACAGGTACCGTCACTTACAG    | YDAFDYWGKRTMVTSLQ  | 129397 | 52     | +      |
| IGH1J07 | 129635 | TTAACTGGGCTTCGACTACTGGGAAAAGGACGATGGTAAACGGTGACTTACAG     | NWAFDYWGKGTMTVTVTS | 129688 | 54     | +      |
| IGH1J08 | 129965 | TTACCACGACTTTGGACTACTGGGAAAAGGACGACGGTCACTTACCTCAG        | YHXALDYWGKGTAVTVTS | 130020 | 56     | +      |
| IGH1J09 | 130612 | TCTACGCTGCTTTTGGACTACTGGGGTAAAGGTACAACGGTAAACCGTTTCAATCAG | YAAFDYWGKGTAVTVSS  | 130665 | 54     | +      |
| IGH2J08 | 204031 | TCTACGCTGCTTTTGGACTACTGGGGTAAAGGTACAACGGTAAACCGTTTCAATCAG | YAAFDYWGKGTAVTVSS  | 204084 | 54     | -      |
| IGH2J07 | 204673 | TTACCACGACTTTGGACTACTGGGAAAAGGACGACGGTCACTTACCTCAG        | YHXALDYWGKGTAVTVTS | 204728 | 56     | -      |
| IGH2J06 | 205005 | ATAACTGGGCTTCGACTACTGGGAAAAGGACGATGGTAAACGGTGACTTACAG     | NWAFDYWGKGTMTVTVTS | 205058 | 54     | -      |
| IGH2J05 | 205296 | CTACGATGCTTTTGGACTACTGGGGAAAAGGACGATGGTCACTTACCTCAG       | YDAFDYWGKRTMVTSLQ  | 205347 | 52     | -      |
| IGH2J04 | 205756 | ACAACGCTTTTGGACTACTGGGGAAAAGGACAACAGGTACCGTCACTTACAG      | NAFDYWGKGTAVTVTS   | 205806 | 51     | -      |
| IGH2J03 | 206111 | ATGGTGTCTTTGACTACTGGGGTAAAGGACCGCAGTCACTGTAACATCAG        | GAFDYWGKGTAVTVTS   | 206161 | 51     | -      |
| IGH2J02 | 206303 | ACCGTGGGGTAAAGGGACAACAGTCACTTACCGTCAAAAACAG               | PWKGTTTVTKT        | 206340 | 38     | -      |
| IGH2J01 | 206466 | ATGACTACTTTGACTACTGGGGAAAAGGAACAATGGTGACGGTCACTTACAG      | DYFDYWGKGTMTVTVTS  | 206516 | 51     | -      |

Table S9: Co-ordinate table of JH segments in the *N. furzeri* IGH locus

| Name    | RSS Start | Nonamer    | Spacer Length | Heptamer | RSS End | RSS Length |
|---------|-----------|------------|---------------|----------|---------|------------|
| IGH1J01 | 26196     | TGTTTTTGT  | 23            | CACTGTG  | 26186   | 39         |
| IGH1J02 | 128188    | AGTGTTTGT  | 23            | CACTGTG  | 128175  | 39         |
| IGH1J03 | 128353    | TGTTTATTT  | 23            | CACTGTG  | 128353  | 39         |
| IGH1J04 | 128545    | GGTTTTTGT  | 23            | CACTGTG  | 128532  | 39         |
| IGH1J05 | 128899    | GGTTTTTAGT | 23            | TACTGTG  | 128886  | 39         |
| IGH1J06 | 129360    | TCTTCTTGT  | 22            | TACTTTG  | 129345  | 38         |
| IGH1J07 | 129650    | AGTTTTTGT  | 23            | TACTGTG  | 129634  | 39         |
| IGH1J08 | 129983    | AGTTTTTAGT | 22            | TACTGTG  | 129964  | 38         |
| IGH1J09 | 130628    | CGTTTTTAT  | 22            | CACTGTG  | 130611  | 38         |
| IGH2J08 | 204047    | CGTTTTTAT  | 22            | CACTGTG  | 204030  | 38         |
| IGH2J07 | 204691    | AGTTTTTAGT | 22            | TACTGTG  | 204672  | 38         |
| IGH2J06 | 205020    | AGTTTTTGT  | 23            | TACTGTG  | 205004  | 39         |
| IGH2J05 | 205310    | TCTTCTTGT  | 22            | TACTTTG  | 205295  | 38         |
| IGH2J04 | 205768    | GGTTTTTAGT | 23            | TACTGTG  | 205755  | 39         |
| IGH2J03 | 206123    | GGTTTTTGT  | 23            | CACTGTG  | 206110  | 39         |
| IGH2J02 | 206302    | TGTTTATTT  | 23            | CACTGTG  | 206302  | 39         |
| IGH2J01 | 206478    | AGTGTTTGT  | 23            | CACTGTG  | 206465  | 39         |

Table S10: Co-ordinate table of JH RSSs in the *N. furzeri* IGH locus

Table S11: Co-ordinate table of constant-region exons in the *X. maculatus* *IGH* locus

| Name      | Isotype | Start  | End    | Length | Strand |
|-----------|---------|--------|--------|--------|--------|
| IGHZ1-1   | Z       | 3380   | 3667   | 288    | +      |
| IGHZ1-2   | Z       | 3814   | 4098   | 285    | +      |
| IGHZ1-3   | Z       | 4195   | 4497   | 303    | +      |
| IGHZ1-4   | Z       | 4934   | 5263   | 330    | +      |
| IGHZ1-S   | Z       | 5264   | 5459   | 196    | +      |
| IGHZ1-TM1 | Z       | 6345   | 6490   | 146    | +      |
| IGHZ1-TM2 | Z       | 6645   | 7043   | 399    | +      |
| IGHZ2-1   | Z       | 256059 | 256337 | 279    | +      |
| IGHZ2-2   | Z       | 256453 | 256734 | 282    | +      |
| IGHZ2-3   | Z       | 256893 | 257171 | 279    | +      |
| IGHZ2-4   | Z       | 257319 | 257636 | 318    | +      |
| IGHZ2-S   | Z       | 257637 | 257850 | 214    | +      |
| IGHZ2-TM1 | Z       | 258059 | 258213 | 155    | +      |
| IGHZ2-TM2 | Z       | 258410 | 258629 | 220    | +      |
| IGHM-1    | M       | 279664 | 279960 | 297    | +      |
| IGHM-2    | M       | 280880 | 281224 | 345    | +      |
| IGHM-3    | M       | 281321 | 281629 | 309    | +      |
| IGHM-4    | M       | 281789 | 282291 | 503    | +      |
| IGHM-TM1  | M       | 282910 | 283034 | 125    | +      |
| IGHM-TM2  | M       | 285028 | 285740 | 713    | +      |
| IGHD-1    | D       | 285902 | 286219 | 318    | +      |
| IGHD-2A   | D       | 286310 | 286597 | 288    | +      |
| IGHD-3A   | D       | 286814 | 287128 | 315    | +      |
| IGHD-4A   | D       | 287250 | 287534 | 285    | +      |
| IGHD-2B   | D       | 288876 | 289166 | 291    | +      |
| IGHD-3B   | D       | 289262 | 289576 | 315    | +      |
| IGHD-4B   | D       | 289680 | 289964 | 285    | +      |
| IGHD-5    | D       | 290052 | 290381 | 330    | +      |
| IGHD-6    | D       | 290472 | 290789 | 318    | +      |
| IGHD-7    | D       | 290865 | 291152 | 288    | +      |
| IGHD-TM1  | D       | 291286 | 291434 | 149    | +      |
| IGHD-TM2  | D       | 291541 | 291642 | 102    | +      |

| Name       | Start | End   | Length | Strand | RSS Start | Heptamer | Spacer Length | Nonamer     | RSS End | RSS Length | Comment    |
|------------|-------|-------|--------|--------|-----------|----------|---------------|-------------|---------|------------|------------|
| IGHV01-01  | 1159  | 1450  | 292    | +      | 1451      | CACAGTG  | 23            | GTA AAA AAC | 1489    | 39         |            |
| IGHV02-01  | 10534 | 10825 | 292    | +      | 10826     | CACAGTG  | 23            | ACA AAA ACC | 10864   | 39         |            |
| IGHV02-02  | 11961 | 12261 | 301    | +      | 12262     | CACAGTG  | 23            | ACA AAA ACT | 12300   | 39         |            |
| IGHV02-03  | 13319 | 13616 | 298    | +      | 13617     | CACAGTG  | 23            | ACA AAA ACT | 13655   | 39         |            |
| IGHV03-01  | 15440 | 15734 | 295    | +      | 15735     | CACAGTG  | 22            | ACA AAA ACT | 15772   | 38         |            |
| IGHV02-04  | 16618 | 16908 | 291    | +      | 16909     | CACAGTG  | 23            | ACA AAA ACC | 16947   | 39         |            |
| IGHV02-05  | 17522 | 17822 | 301    | +      | 17823     | CACAGTG  | 22            | ACA AAA ACT | 17860   | 38         |            |
| IGHV02-06  | 18881 | 19178 | 298    | +      | 19179     | CACAGTG  | 23            | ACA AAA ACT | 19217   | 39         |            |
| IGHV03-02  | 21000 | 21294 | 295    | +      | 21295     | CACAGTG  | 22            | ACA AAA ACT | 21332   | 38         |            |
| IGHV02-07  | 22179 | 22467 | 289    | +      | 22468     | CACAGTG  | 23            | ACA AAA ACC | 22506   | 39         |            |
| IGHV02-08p | 24234 | 24514 | 281    | +      | 24515     | CACAGTG  | 23            | ACA AAA ACT | 24553   | 39         | Frameshift |
| IGHV04-01  | 25359 | 25659 | 301    | +      | 25660     | CACAGTG  | 23            | ACA AAA ACT | 25698   | 39         |            |
| IGHV04-02  | 27066 | 27366 | 301    | +      | 27367     | CACAGTG  | 23            | ACA AAA ACA | 27405   | 39         |            |
| IGHV02-09  | 28669 | 28958 | 290    | +      | 28959     | CACAGTG  | 23            | ACA AAA ACC | 28997   | 39         |            |
| IGHV02-10p | 30460 | 30741 | 282    | +      | 30742     | CACAATG  | 23            | ACA AAA ACT | 30780   | 39         | Frameshift |
| IGHV02-11  | 32395 | 32681 | 287    | +      | 32682     | CACAGTG  | 23            | ACA AAA ACC | 32720   | 39         |            |
| IGHV03-03  | 33663 | 33957 | 295    | +      | 33958     | CACAGTG  | 22            | ACA AAA ACT | 33995   | 38         |            |
| IGHV02-12  | 35012 | 35299 | 288    | +      | 35300     | CACAGTG  | 23            | ACA AAA ACC | 35338   | 39         |            |
| IGHV03-04  | 36281 | 36575 | 295    | +      | 36576     | CACAGTG  | 22            | ACA AAA ACT | 36613   | 38         |            |
| IGHV02-13  | 37639 | 37931 | 293    | +      | 37932     | CACAGTG  | 23            | ACA AAA ACT | 37970   | 39         |            |
| IGHV02-14  | 39019 | 39311 | 293    | +      | 39312     | CACAGTG  | 23            | ACA AAA ACT | 39350   | 39         |            |
| IGHV03-05  | 41008 | 41302 | 295    | +      | 41303     | CACAGTG  | 22            | ACA AAA ACT | 41340   | 38         |            |
| IGHV02-15  | 42660 | 42952 | 293    | +      | 42953     | CACAGTG  | 23            | ACA AAA ACT | 42991   | 39         |            |
| IGHV03-06  | 45081 | 45375 | 295    | +      | 45376     | CACAGTG  | 22            | ACA AAA ACT | 45413   | 38         |            |
| IGHV02-16  | 46732 | 47024 | 293    | +      | 47025     | CACAGTG  | 23            | ACA AAA ACT | 47063   | 39         |            |

Table S12: Co-ordinate table of VH segments in the *X. maculatus* IGH locus, part 1

| Name       | Start | End   | Length | Strand | RSS Start | Heptamer | Spacer Length | Nonamer     | RSS End | RSS Length | Comment              |
|------------|-------|-------|--------|--------|-----------|----------|---------------|-------------|---------|------------|----------------------|
| IGHV03-07  | 48618 | 48912 | 295    | +      | 48913     | CACAGTG  | 22            | ACAAAAAACT  | 48950   | 38         |                      |
| IGHV02-17  | 50323 | 50611 | 289    | +      | 50612     | CACAGTG  | 23            | ACAAAAAAACC | 50650   | 39         |                      |
| IGHV03-08  | 51890 | 52184 | 295    | +      | 52185     | CACAGTG  | 22            | ACAAAAAACT  | 52222   | 38         |                      |
| IGHV03-09p | 53026 | 53274 | 249    | +      | 53275     |          |               |             |         |            | 3'-truncated, no RSS |
| IGHV02-18  | 54462 | 54747 | 286    | +      | 54748     | CACAGTG  | 23            | ACAAAAAAACC | 54786   | 39         |                      |
| IGHV02-19p | 55729 | 55866 | 138    | +      | 55867     | CACAGTG  | 23            | ACAAAAAAACC | 55905   | 39         | 3'-truncated         |
| IGHV03-10  | 57371 | 57662 | 292    | +      | 57663     | CACAGTG  | 22            | ACAAAAAACT  | 57700   | 38         |                      |
| IGHV02-20p | 58698 | 58986 | 289    | +      | 58987     | CACAGTG  | 23            | ATAAAAAACC  | 59025   | 39         | Nonsense mutation    |
| IGHV03-11  | 59940 | 60234 | 295    | +      | 60235     | CACAGTG  | 22            | ACAAAAAACT  | 60272   | 38         |                      |
| IGHV02-21  | 61249 | 61537 | 289    | +      | 61538     | CACAGTG  | 23            | ATAAAAAACC  | 61576   | 39         |                      |
| IGHV03-12  | 62491 | 62785 | 295    | +      | 62786     | CACAGTG  | 22            | ACAAAAAACT  | 62823   | 38         |                      |
| IGHV02-22  | 63801 | 64089 | 289    | +      | 64090     | CACAGTG  | 23            | ATAAAAAACC  | 64128   | 39         |                      |
| IGHV03-13  | 65043 | 65337 | 295    | +      | 65338     | CACAGTG  | 22            | ACAAAAAACT  | 65375   | 38         |                      |
| IGHV02-23  | 66354 | 66640 | 287    | +      | 66641     | CACAGTG  | 23            | ACAAAAAACT  | 66679   | 39         |                      |
| IGHV03-14  | 68452 | 68743 | 292    | +      | 68744     | CACTATG  | 22            | ACAAAAAACTC | 68781   | 38         |                      |
| IGHV02-24  | 70101 | 70389 | 289    | +      | 70390     | CACAGTG  | 23            | ACAAAAAAACC | 70428   | 39         |                      |
| IGHV03-15  | 72206 | 72501 | 296    | +      | 72502     | CACAGTG  | 22            | ACAAAAAACT  | 72539   | 38         |                      |
| IGHV02-25  | 73484 | 73772 | 289    | +      | 73773     | CACAGTG  | 23            | ACAAAAAAACC | 73811   | 39         |                      |
| IGHV03-16  | 75799 | 76090 | 292    | +      | 76091     | CACAGTG  | 22            | ACAAAAAACT  | 76128   | 38         |                      |
| IGHV03-17  | 77773 | 78067 | 295    | +      | 78068     | CACAGTG  | 22            | ACAAAAAACT  | 78105   | 38         |                      |
| IGHV02-26  | 79001 | 79289 | 289    | +      | 79290     | CACAGTG  | 23            | ACAAAAAAACC | 79328   | 39         |                      |
| IGHV03-18  | 80492 | 80784 | 293    | +      | 80785     | CACAGTG  | 22            | ACAAAAAACT  | 80822   | 38         |                      |
| IGHV02-27p | 81799 | 82082 | 284    | +      | 82083     | CACAGTG  | 23            | ACAAAAAAACC | 82121   | 39         | Frameshift           |
| IGHV03-19  | 83736 | 84030 | 295    | +      | 84031     | CACAGTG  | 22            | ACAAAAAACT  | 84068   | 38         |                      |
| IGHV02-28p | 85093 | 85381 | 289    | +      | 85382     | CACAGGG  | 23            | GCAAAAAACC  | 85420   | 39         | Nonsense mutation    |

Table S13: Co-ordinate table of VH segments in the *X. maculatus IGH* locus, part 2

| Name       | Start  | End    | Length | Strand | RSS Start | Heptamer | Spacer Length | Nonamer     | RSS End | RSS Length | Comment           |
|------------|--------|--------|--------|--------|-----------|----------|---------------|-------------|---------|------------|-------------------|
| IGHV02-29  | 86225  | 86505  | 281    | +      | 86506     | CACAGTG  | 23            | ATAAAAACC   | 86544   | 39         |                   |
| IGHV03-20  | 87419  | 87713  | 295    | +      | 87714     | CACAGTG  | 22            | ACAAAAAACC  | 87751   | 38         |                   |
| IGHV03-21  | 94532  | 94826  | 295    | +      | 94827     | CACAGTG  | 23            | ACAAAAAACC  | 94865   | 39         |                   |
| IGHV03-22  | 96192  | 96489  | 298    | +      | 96490     | CACAGTG  | 23            | ACAAAAAACC  | 96528   | 39         |                   |
| IGHV03-23  | 98068  | 98368  | 301    | +      | 98369     | CACAGTG  | 23            | ACAAAAAACC  | 98407   | 39         |                   |
| IGHV03-24  | 99482  | 99779  | 298    | +      | 99780     | CACAGTG  | 23            | ACAAAAAACC  | 99818   | 39         |                   |
| IGHV03-25  | 101639 | 101936 | 298    | +      | 101937    | CACAGTG  | 23            | ACAAAAAACC  | 101975  | 39         |                   |
| IGHV05-01p | 102818 | 103096 | 279    | +      | 103097    | CAGAAAGC | 0             | ACAAAAAACC  | 103112  | 16         | Frameshift        |
| IGHV03-26  | 104098 | 104389 | 292    | +      | 104390    | CACAGTG  | 23            | ACAAAAAACC  | 104428  | 39         |                   |
| IGHV06-01  | 105551 | 105831 | 281    | +      | 105832    | CACAGTG  | 23            | ACAAAAAACC  | 105870  | 39         |                   |
| IGHV03-27  | 107274 | 107571 | 298    | +      | 107572    | CACAGTG  | 23            | ACAAAAAACC  | 107610  | 39         |                   |
| IGHV03-28  | 108775 | 109072 | 298    | +      | 109073    | CACAGAG  | 23            | ACAAAAAACC  | 109111  | 39         |                   |
| IGHV03-29  | 110372 | 110672 | 301    | +      | 110673    | CACAGTG  | 23            | ACAAAAAACC  | 110711  | 39         |                   |
| IGHV07-01  | 111565 | 111856 | 292    | +      | 111857    | CACAATG  | 23            | ACAAAAAACC  | 111895  | 39         |                   |
| IGHV08-01p | 113033 | 113330 | 298    | +      | 113331    | CACAGAG  | 23            | CCAAAGAAACC | 113369  | 39         | Nonsense mutation |
| IGHV09-01  | 115512 | 115800 | 289    | +      | 115801    | CACAGTG  | 22            | ACAAAAAACC  | 115838  | 38         |                   |
| IGHV10-01  | 117078 | 117379 | 302    | +      | 117380    | CACAGTG  | 22            | ACATAAAACC  | 117417  | 38         |                   |
| IGHV11-01  | 119462 | 119760 | 299    | +      | 119761    | CACAGTG  | 23            | ACAAAAAACC  | 119799  | 39         |                   |
| IGHV03-30  | 126125 | 126416 | 292    | +      | 126417    | CACAGTG  | 22            | ACAAAAAACC  | 126454  | 38         |                   |
| IGHV03-31  | 127109 | 127400 | 292    | +      | 127401    | CACAGTG  | 23            | GCAAAAAACC  | 127439  | 39         |                   |
| IGHV12-01  | 128489 | 128786 | 298    | +      | 128787    | CACAGTG  | 23            | ACAAAAAACC  | 128825  | 39         |                   |
| IGHV02-30  | 135711 | 136000 | 290    | +      | 136001    | CACAGTG  | 22            | ACAAAAACA   | 136038  | 38         |                   |
| IGHV13-01  | 136757 | 137057 | 301    | +      | 137058    | CACAGTG  | 23            | ACAAAAAACC  | 137096  | 39         |                   |
| IGHV02-31  | 138344 | 138637 | 294    | +      | 138638    | CACAGTG  | 23            | ACAAAAATC   | 138676  | 39         |                   |
| IGHV02-32  | 140024 | 140315 | 292    | +      | 140316    | CACTGTG  | 23            | ACAAAAAACC  | 140354  | 39         |                   |

Table S14: Co-ordinate table of VH segments in the *X. maculatus* IGH locus, part 3

| Name       | Start  | End    | Length | Strand | RSS Start | Heptamer | Spacer Length | Nonamer    | RSS End | RSS Length | Comment           |
|------------|--------|--------|--------|--------|-----------|----------|---------------|------------|---------|------------|-------------------|
| IGHV02-33  | 142332 | 142620 | 289    | +      | 142621    | CACAGTG  | 23            | ACAAAAACA  | 142659  | 39         |                   |
| IGHV02-34  | 144334 | 144625 | 292    | +      | 144626    | CACAGTG  | 23            | ACAAAAAAT  | 144664  | 39         |                   |
| IGHV02-35  | 145740 | 146031 | 292    | +      | 146032    | CACAGTG  | 23            | ACAAAAAAT  | 146070  | 39         |                   |
| IGHV02-36  | 146903 | 147194 | 292    | +      | 147195    | CACAGTG  | 23            | ACAAAAAAT  | 147233  | 39         |                   |
| IGHV02-37  | 147839 | 148138 | 300    | +      | 148139    | CACAGTG  | 23            | ACAAAAAATC | 148177  | 39         |                   |
| IGHV02-38p | 150504 | 150797 | 294    | +      | 150798    | CACAATA  | 23            | ACAAAAAACC | 150836  | 39         | Nonsense mutation |
| IGHV02-39  | 152249 | 152537 | 289    | +      | 152538    | CACAGTA  | 23            | ACAAAAAACC | 152576  | 39         |                   |
| IGHV14-01  | 154075 | 154374 | 300    | +      | 154375    | CACAGTG  | 23            | ACAAAAAGT  | 154413  | 39         |                   |
| IGHV02-40  | 155433 | 155709 | 277    | +      | 155710    | CACAGTG  | 23            | ACAAAAAACC | 155748  | 39         |                   |
| IGHV02-41  | 156583 | 156870 | 288    | +      | 156871    | CACAGTG  | 23            | ACAAAAAACC | 156909  | 39         |                   |
| IGHV02-42  | 163977 | 164269 | 293    | +      | 164270    | CACAGTG  | 23            | ACAAAAACC  | 164308  | 39         |                   |
| IGHV03-32  | 165416 | 165708 | 293    | +      | 165709    | CACAGTG  | 22            | ACAAAAACA  | 165746  | 38         |                   |
| IGHV02-43  | 166994 | 167293 | 300    | +      | 167294    | CACAATG  | 23            | ACAGAAACT  | 167332  | 39         |                   |
| IGHV12-02  | 169602 | 169900 | 299    | +      | 169901    | CACAGTG  | 23            | ACAAAAAACC | 169939  | 39         |                   |
| IGHV02-44  | 171452 | 171752 | 301    | +      | 171753    | CACAGTG  | 23            | GCAAAAAACT | 171791  | 39         |                   |
| IGHV02-45  | 173096 | 173384 | 289    | +      | 173385    | CTCAGTG  | 23            | ACAAAAAACC | 173423  | 39         |                   |
| IGHV02-46  | 174714 | 175009 | 296    | +      | 175010    | CACAGTG  | 23            | ACAAAAAACC | 175048  | 39         |                   |
| IGHV02-47  | 176396 | 176697 | 302    | +      | 176698    | CACAGTG  | 23            | ACAAAAAACC | 176736  | 39         |                   |
| IGHV12-03  | 178422 | 178719 | 298    | +      | 178720    | CACAGTG  | 23            | ACAAAAACA  | 178758  | 39         |                   |
| IGHV12-04  | 181245 | 181543 | 299    | +      | 181544    | CACAGTG  | 23            | ACAAAAAACC | 181582  | 39         |                   |
| IGHV02-48p | 182977 | 183236 | 260    | +      | 183237    | CACAGGT  | 8             | ACAAAAAAT  | 183260  | 24         | 5'-truncated      |
| IGHV02-49p | 184323 | 184611 | 289    | +      | 184612    | CACAGTG  | 23            | ACAAAAAACC | 184650  | 39         | Nonsense mutation |
| IGHV02-50  | 185946 | 186244 | 299    | +      | 186245    | CACAGTG  | 23            | ACAAAAAAT  | 186283  | 39         |                   |
| IGHV02-51  | 187624 | 187925 | 302    | +      | 187926    | CACAGTG  | 23            | ACAAAAAAT  | 187964  | 39         |                   |
| IGHV12-05  | 190987 | 191284 | 298    | +      | 191285    | CACAGTG  | 23            | ACAAAAACA  | 191323  | 39         |                   |

Table S15: Co-ordinate table of VH segments in the X. maculatus IGH locus, part 4



| Name       | Start  | End    | Length | Strand | RSS Start | Heptamer | Spacer Length | Nonamer    | RSS End | RSS Length | Comment                                 |
|------------|--------|--------|--------|--------|-----------|----------|---------------|------------|---------|------------|-----------------------------------------|
| IGHV02-52  | 192570 | 192868 | 299    | +      | 192869    | CACAGTG  | 19            | CTGAAAAACC | 192903  | 35         |                                         |
| IGHV12-06  | 193608 | 193906 | 299    | +      | 193907    | CACAGTG  | 23            | ACAAAAACA  | 193945  | 39         |                                         |
| IGHV02-53  | 195271 | 195572 | 302    | +      | 195573    | CACAGTG  | 23            | ACAAAAACC  | 195611  | 39         |                                         |
| IGHV15-01  | 204396 | 204693 | 298    | +      | 204694    | CACAATC  | 23            | ACAAAAAACC | 204732  | 39         |                                         |
| IGHV13-02  | 206203 | 206503 | 301    | +      | 206504    | CACAGTG  | 23            | ACAAAAAACC | 206542  | 39         |                                         |
| IGHV16-01  | 207726 | 208020 | 295    | +      | 208021    | CACAGTG  | 22            | ACAAAAAACC | 208058  | 38         |                                         |
| IGHV13-03  | 208477 | 208777 | 301    | +      | 208778    | CACAGTA  | 23            | ACAAAAAACC | 208816  | 39         |                                         |
| IGHV03-33  | 209921 | 210215 | 295    | +      | 210216    | CACGGTG  | 22            | ACGAAAAACC | 210253  | 38         |                                         |
| IGHV17-01  | 211322 | 211625 | 304    | +      | 211626    | CACAGTA  | 23            | ACAAAAAACC | 211664  | 39         |                                         |
| IGHV15-02p | 214600 | 214860 | 261    | +      | 214861    |          |               |            |         |            | 3'-truncated, no RSS                    |
| IGHV18-01  | 215671 | 215962 | 292    | +      | 215963    | CACACTG  | 23            | ACAAAAAACC | 216001  | 39         |                                         |
| IGHV19-01  | 217874 | 218174 | 301    | +      | 218175    | CACAGTG  | 23            | ACAAAAAACC | 218213  | 39         |                                         |
| IGHV03-34  | 219368 | 219668 | 301    | +      | 219669    | CACAGTG  | 23            | ACAAAAACA  | 219707  | 39         |                                         |
| IGHV20-01  | 220329 | 220632 | 304    | +      | 220633    | CACAGTG  | 23            | ACAAAAATT  | 220671  | 39         |                                         |
| IGHV02-54p | 228547 | 228838 | 292    | +      | 228839    | CACACTG  | 23            | ACAACCCCC  | 228877  | 39         | Nonsense mutation                       |
| IGHV02-55  | 229963 | 230267 | 305    | +      | 230268    | CACAGCG  | 23            | ACAAAAAAA  | 230306  | 39         |                                         |
| IGHV03-35  | 231630 | 231928 | 299    | +      | 231929    | CACAGTG  | 23            | ACAAAAAACC | 231967  | 39         |                                         |
| IGHV21-01p | 233069 | 233230 | 162    | +      | 233231    |          |               |            |         |            | Nonsense mutation, 3'-truncated, no RSS |
| IGHV22-01p | 234954 | 235102 | 149    | +      | 235103    | CACAGTG  | 23            | TCAAAAAACC | 235141  | 39         | 5'-truncated                            |
| IGHV02-56  | 236029 | 236330 | 302    | +      | 236331    | CACAGTG  | 23            | ACAAATACC  | 236369  | 39         |                                         |
| IGHV03-36p | 238122 | 238413 | 292    | +      | 238414    | CACAATG  | 23            | ACAGAATCC  | 238452  | 39         | Nonsense mutation                       |
| IGHV11-02p | 240281 | 240579 | 299    | +      | 240580    | CACAGTG  | 24            | ACAAAAAACC | 240619  | 40         | Nonsense mutation                       |
| IGHV09-02  | 241878 | 242166 | 289    | +      | 242167    | CACAGTG  | 22            | ACAAAAAACC | 242204  | 38         |                                         |
| IGHV23-01  | 243867 | 244164 | 298    | +      | 244165    | CACAGTG  | 23            | ACAAAAATCC | 244203  | 39         |                                         |
| IGHV02-57  | 245524 | 245813 | 290    | +      | 245814    | CACCATA  | 22            | ACAAAAATCC | 245851  | 38         |                                         |

Table S16: Co-ordinate table of VH segments in the *X. maculatus IGH* locus, part 5

583 Table S17: Co-ordinate table of DH segments in the *X. maculatus* *IGH* locus

| Name    | Start  | NT Sequence         | End    | Length | Strand |
|---------|--------|---------------------|--------|--------|--------|
| IGHDZ01 | 2243   | GTGGGCAGGAGGCTATGC  | 2260   | 18     | +      |
| IGHDZ02 | 119768 | AGG                 | 119770 | 3      | +      |
| IGHDZ03 | 128794 | ACTAAAGG            | 128801 | 8      | +      |
| IGHDZ04 | 129907 | ATCGGG              | 129912 | 6      | +      |
| IGHDZ05 | 158017 | ATATATGGGGG         | 158027 | 11     | +      |
| IGHDZ06 | 197791 | ATATACTGGGGTGG      | 197804 | 14     | +      |
| IGHDZ07 | 222022 | ATGGACTGGGGGG       | 222034 | 13     | +      |
| IGHDZ08 | 247941 | GTGATTACGGCTACGGGGC | 247959 | 19     | +      |
| IGHDZ09 | 249514 | TTATGGGCTGGGGAG     | 249528 | 15     | +      |
| IGHDZ10 | 253752 | TGGGTGGGGC          | 253761 | 10     | +      |
| IGHDM01 | 267392 | TATACAGTGGCAAC      | 267405 | 14     | +      |
| IGHDM02 | 268498 | CAGTATAGCAAC        | 268509 | 12     | +      |
| IGHDM03 | 268836 | TACAATGGCAAC        | 268847 | 12     | +      |
| IGHDM04 | 269694 | TAAACAGTGGCTAC      | 269707 | 14     | +      |

585 Table S18: Co-ordinate table of DH 5'-RSSs in the *X. maculatus* *IGH* locus

| Name    | 5'-RSS Start | Nonamer   | Spacer Length | Heptamer | 5'-RSS End | Length |
|---------|--------------|-----------|---------------|----------|------------|--------|
| IGHDZ01 | 2215         | GGTTTTTGT | 12            | CACTGTG  | 2242       | 28     |
| IGHDZ02 | 119739       | TGTATTACT | 13            | CACAGTG  | 119767     | 29     |
| IGHDZ03 | 128766       | TTTACTTCT | 12            | CACAGTG  | 128793     | 28     |
| IGHDZ04 | 129879       | GGTTTTTGT | 12            | CACAGTG  | 129906     | 28     |
| IGHDZ05 | 157989       | AGTTTTTGT | 12            | CACAGTG  | 158016     | 28     |
| IGHDZ06 | 197763       | GGTTTTTGC | 12            | TACTGTG  | 197790     | 28     |
| IGHDZ07 | 221994       | GGTTTTTGT | 12            | CGCTGTG  | 222021     | 28     |
| IGHDZ08 | 247913       | TGTTTTTGT | 12            | ATCTGTG  | 247940     | 28     |
| IGHDZ09 | 249486       | AGTTTTTGT | 12            | TGTGGTG  | 249513     | 28     |
| IGHDZ10 | 253724       | AGTTTTTGT | 12            | TGTAGTG  | 253751     | 28     |
| IGHDM01 | 267364       | AGTTTTTGT | 12            | TACAGTG  | 267391     | 28     |
| IGHDM02 | 268470       | TGTTTTTGT | 12            | CACAGTG  | 268497     | 28     |
| IGHDM03 | 268808       | AGTTTTTGC | 12            | TACTGTG  | 268835     | 28     |
| IGHDM04 | 269666       | CGTTTTTGT | 12            | CATTGTG  | 269693     | 28     |

587 Table S19: Co-ordinate table of DH 3'-RSSs in the *X. maculatus* *IGH* locus

| Name    | 3'-RSS Start | Heptamer | Spacer Length | Nonamer   | 3'-RSS End | Length |
|---------|--------------|----------|---------------|-----------|------------|--------|
| IGHDZ01 | 2261         | CACTAAG  | 12            | ACAAAAAGT | 2288       | 28     |
| IGHDZ02 | 119771       | CAAAAATG | 13            | ACAAAAACT | 119799     | 29     |
| IGHDZ03 | 128802       | CAGAGAA  | 8             | ACAAAAACC | 128825     | 24     |
| IGHDZ04 | 129913       | CACAATG  | 12            | TCAAAAACC | 129940     | 28     |
| IGHDZ05 | 158028       | CACAGAG  | 12            | ACAAAAACC | 158055     | 28     |
| IGHDZ06 | 197805       | CACACAG  | 12            | ACAAAAACC | 197832     | 28     |
| IGHDZ07 | 222035       | CACAGAG  | 12            | ACAAAAACC | 222062     | 28     |
| IGHDZ08 | 247960       | CACAATA  | 12            | ACAAAAACC | 247987     | 28     |
| IGHDZ09 | 249529       | CACAATG  | 12            | ACAAAAACC | 249556     | 28     |
| IGHDZ10 | 253762       | CACAGTA  | 12            | ACAAAAACC | 253789     | 28     |
| IGHDM01 | 267406       | CACAGTG  | 12            | GCAAAAACC | 267433     | 28     |
| IGHDM02 | 268510       | CACAGTG  | 12            | ACAGAAACC | 268537     | 28     |
| IGHDM03 | 268848       | CACAGTG  | 12            | ACAAAAACC | 268875     | 28     |
| IGHDM04 | 269708       | CACTGTG  | 12            | ACAAAATCA | 269735     | 28     |

588

| Name    | Start  | NT Sequence                                               | AA Sequence        | End    | Length | Strand |
|---------|--------|-----------------------------------------------------------|--------------------|--------|--------|--------|
| IGHJZ01 | 2653   | ATGCCCTTAGATTACTGGGGTGAAGGGACCAGAGTACACAGTACTGACTTCAG     | ALDYWGEGRVTVTS     | 2700   | 48     | +      |
| IGHJZ02 | 120639 | AITACGCTCTTGACTACTGGGGAGCAGGAAACAAAGTTACTGTAAAGCCAG       | YALDYWGAGTKVTKP    | 120689 | 51     | +      |
| IGHJZ03 | 130376 | ACTACGGCTTTGATTACTGGGGAGACGGAACTGAAAGTTACTGTTGAACCCAG     | YGFYWDGTEVTEP      | 130426 | 51     | +      |
| IGHJZ04 | 158408 | AGATTTAGACTACTGGGGTAATGGAACAACAGTACACGGTCTTACCAG          | DLDYWNGGTTVTLPL    | 158454 | 47     | +      |
| IGHJZ05 | 198186 | AITATGGTTTTGACTACTGGGGAGACGGAAACACAGTCACTGTTAGTCCAG       | YGFYWDGDTTVVSP     | 198236 | 51     | +      |
| IGHJZ06 | 222417 | ATGCTTTTGACGCTCTGGGGTAAAGGAACCCACAGTACTGTGTACCAG          | AFDVWGGKTTVVVPP    | 222464 | 48     | +      |
| IGHJZ07 | 254130 | ATGTTTTGACTACTGGGGTAAAGGGACTGATGTACACAGTAICTCCAG          | VFDYWGGKTDVTVSP    | 254177 | 48     | +      |
| IGHJM01 | 276014 | ACGGCTACTCCGACTACTGGGGAAAGGAACAAAGTCAACAGTACTTCTG         | GYFDYWGGKGTQVTVTS  | 276064 | 51     | +      |
| IGHJM02 | 276284 | CCACTACTTTGACTACTGGGGAAAGGAACCCACGGTTACCGTCACTTCAG        | HYFDYWGGKGTTVTVTS  | 276333 | 50     | +      |
| IGHJM03 | 276654 | ACAATGCTTTTGACTACTGGGGAAAGGAACACTAGCGGTAAACAGTAACATCAG    | NAFDYWGGKGTTVTVTS  | 276704 | 51     | +      |
| IGHJM04 | 276999 | ACTACGCTTTTGACTACTGGGGAAAGGAACAATGGTCACTGTCACTTCAG        | YAFDYWGKGTMTVTVS   | 277049 | 51     | +      |
| IGHJM05 | 277322 | ACAACCTGGGCTTTTGACTACTGGGGAGCAGGAACCAATGGTAAACAGTAACATCAG | NWAFDYWGAGTMTVTVS  | 277375 | 54     | +      |
| IGHJM06 | 277672 | CTACGGTCTTTTGACTACTGGGGTAAAGGGACTACAGTCAACCGTCACTTCAG     | YGAFDYWGGKGTTVTVTS | 277724 | 53     | +      |
| IGHJM07 | 278150 | CTACGATGCTTTTGACTACTGGGGAAAGGAACAACAGTCAACCGTCACTTCAG     | YDAFDYWGGKGTTVTVTS | 278205 | 56     | +      |
| IGHJM08 | 278606 | TTACTACTACGCTTTTGACTACTGGGGAAAGGGACAATGGTCAACCGTCACTTCAG  | YYAFDYWGKGTMTVTVS  | 278661 | 56     | +      |

589

590

Table S20: Co-ordinate table of JH segments in the *X. maculatus IGH* locus

| Name    | RSS Start | Nonamer    | Spacer Length | Heptamer | RSS End | RSS Length |
|---------|-----------|------------|---------------|----------|---------|------------|
| IGHJZ01 | 2662      | TGTTTTTGT  | 23            | CACTGTG  | 2652    | 39         |
| IGHJZ02 | 120651    | TGTTTTTGT  | 23            | CACTGTG  | 120638  | 39         |
| IGHJZ03 | 130388    | TGTTTTTGT  | 23            | CACCGTG  | 130375  | 39         |
| IGHJZ04 | 158416    | GGTTTTTGT  | 23            | CACTGTG  | 158407  | 39         |
| IGHJZ05 | 198198    | GGTTTTTGT  | 23            | CACTGTG  | 198185  | 39         |
| IGHJZ06 | 222426    | TGTTTTTGT  | 23            | CACTGTG  | 222416  | 39         |
| IGHJZ07 | 254139    | GGTTTTTGT  | 23            | CACTGTG  | 254129  | 39         |
| IGHJM01 | 276026    | TGTAATTTGT | 23            | CACTGTG  | 276013  | 39         |
| IGHJM02 | 276295    | TAATTTTGC  | 23            | CACCGTG  | 276283  | 39         |
| IGHJM03 | 276666    | TGTTTTTGT  | 23            | TACTGTG  | 276653  | 39         |
| IGHJM04 | 277011    | TGTTTTAGT  | 23            | TACTGTG  | 276998  | 39         |
| IGHJM05 | 277338    | GGTTTTTGT  | 22            | TACTGTG  | 277321  | 38         |
| IGHJM06 | 277687    | GCTTTTTAT  | 22            | CACTGTG  | 277671  | 38         |
| IGHJM07 | 278168    | CCTTTTTAC  | 22            | CACTGTG  | 278149  | 38         |
| IGHJM08 | 278624    | GCTTTTTAA  | 22            | CACTGTG  | 278605  | 38         |

Table S21: Co-ordinate table of JH RSSs in the *X. maculatus IGH* locus

591

592

| Species                          | Scaffold(s)                 | Region | Isotype | Known Exons <sup>1</sup> | Complete? | Pseudo-exons | Comments                                |
|----------------------------------|-----------------------------|--------|---------|--------------------------|-----------|--------------|-----------------------------------------|
| <i>Nothobranchius orthonotus</i> | scf33878                    | IGHM1  | M       | 1,2,3, TM1               | No        | -            | CM4 missing (missing sequence)          |
| <i>Nothobranchius orthonotus</i> | scf33878                    | IGHD1  | D       | 1,2,3,4,2,3,4,5,6,7, TM1 | Yes       | -            |                                         |
| <i>Nothobranchius orthonotus</i> | scf34438                    | IGHM2  | M       | 1,2,3,4, TM1             | Yes       | -            |                                         |
| <i>Nothobranchius orthonotus</i> | scf34438, scf33917          | IGHD2  | D       | 1,2,3,4,2,3,4,5,6,7, TM1 | Yes       | -            |                                         |
| <i>Nothobranchius orthonotus</i> | scf33917                    | IGHD3  | D       | 1,2,3,4,2,3,4,5,6,7, TM1 | Yes       | -            |                                         |
| <i>Nothobranchius orthonotus</i> | scf33917                    | IGHD4  | D       | 1,2,3,4,2,3,4,5,6,7, TM1 | Yes       | -            |                                         |
| <i>Nothobranchius orthonotus</i> | scf9255, scf26119, scf33917 | IGHD5  | D       | 3,4,2,3,4,5,6,7, TM1     | No        | -            | CD1 & CD2A missing (missing sequence)   |
| <i>Nothobranchius orthonotus</i> | scf27951, scf33789          | IGHM3  | M       | 1,2,3,4, TM1             | Yes       | -            |                                         |
| <i>Nothobranchius orthonotus</i> | scf27951, 32033             | IGHD6  | D       | 1,2,3,4,2,3,4,5,6,7, TM1 | Yes       | -            |                                         |
| <i>Nothobranchius orthonotus</i> | scf32137, scf21286          | IGHM4  | M       | 1,2,3,4, TM1             | Yes       | -            |                                         |
| <i>Nothobranchius furzeri</i>    | chr6 + BACs                 | IGHM1  | M       | 1,2,3,4, TM1             | Yes       | -            |                                         |
| <i>Nothobranchius furzeri</i>    | chr6 + BACs                 | IGHD1  | D       | 1,2,3,4,2,3,4,5,6,7, TM1 | Yes       | -            |                                         |
| <i>Nothobranchius furzeri</i>    | chr6 + BACs                 | IGHM2  | M       | 1,2,3,4, TM1             | Yes       | -            |                                         |
| <i>Nothobranchius furzeri</i>    | chr6 + BACs                 | IGHD2  | D       | 1,2,3,4,2,3,4,5,6,7, TM1 | Yes       | -            |                                         |
| <i>Aphyosemion australe</i>      | scf373                      | IGHM   | M       | 1,2,3,4, TM1             | Yes       | -            |                                         |
| <i>Aphyosemion australe</i>      | scf373                      | IGHD   | D       | 1,2,3,4,5,6,7, TM1       | Yes       | -            |                                         |
| <i>Callopanchax toddi</i>        | scf107                      | IGHZ1  | Z       | 1,2,3,4, TM1             | Yes       | -            |                                         |
| <i>Callopanchax toddi</i>        | scf107                      | IGHZ2  | Z       | 1,2,3,4, TM1             | Yes       | -            |                                         |
| <i>Callopanchax toddi</i>        | scf1209                     | IGHZ3  | Z       | 1,2,3,4, TM1             | Yes       | -            |                                         |
| <i>Callopanchax toddi</i>        | scf1209                     | IGHM1  | M       | 1                        | No        | -            | Isolated CM1 exon                       |
| <i>Callopanchax toddi</i>        | scf945                      | IGHZ4  | Z       | 1,2,3,4, TM1             | Yes       | -            |                                         |
| <i>Callopanchax toddi</i>        | scf945                      | IGHM2  | M       | 1,2,3,4, TM1             | Yes       | -            |                                         |
| <i>Callopanchax toddi</i>        | scf945                      | IGHD1  | D       | 1,2,3,4,5,6,7, TM1       | Yes       | 1,4,5        | Frameshift mutations in CD1, CD4 & CD5  |
| <i>Callopanchax toddi</i>        | scf265                      | IGHM3  | M       | 1,2,3,4, TM1             | Yes       | -            |                                         |
| <i>Callopanchax toddi</i>        | scf265                      | IGHD2  | D       | 1,5,7, TM1               | No        | -            | CD2-4 & CD5-6 missing (not in sequence) |

<sup>1</sup> Excluding TM2 and secretory exons.

Table S22: *IGH* constant regions in cyprinidontiform fish, part 1

| Species                        | Scaffold(s)                    | Region | Isotype | Known Exons <sup>1</sup> | Complete? | Pseudo-exons | Comments                                   |
|--------------------------------|--------------------------------|--------|---------|--------------------------|-----------|--------------|--------------------------------------------|
| <i>Pachypanchax playfairii</i> | scf547                         | IGHZ   | Z       | 1,2,3,4, TM1             | Yes       | -            |                                            |
| <i>Pachypanchax playfairii</i> | scf125                         | IGHM1  | M       | 1,2,3,4, TM1             | Yes       | -            |                                            |
| <i>Pachypanchax playfairii</i> | scf125                         | IGHD   | D       | 1,2,3,4,5,6,7, TM1       | Yes       | -            |                                            |
| <i>Pachypanchax playfairii</i> | scf547                         | IGHM2  | M       | 1                        | No        | -            | Isolated CM1 exon                          |
| <i>Austrofundulus limnaeus</i> | NW_013954375.1                 | IGHZ   | Z       | TM1                      | No        | TM1          | Isolated TM1 exon with frameshift mutation |
| <i>Austrofundulus limnaeus</i> | NW_013952673.1                 | IGHM   | M       | 1,2,3,4, TM1             | Yes       | -            |                                            |
| <i>Austrofundulus limnaeus</i> | NW_013952673.1, NW_013956335.1 | IGHD   | D       | 1,2,3,4,5,6,7, TM1       | Yes       | -            |                                            |
| <i>Kryptolebias marmoratus</i> | NW_016094348.1                 | IGHZ1  | Z       | 1,2,3,4, TM1             | Yes       | -            |                                            |
| <i>Kryptolebias marmoratus</i> | NW_016094348.1                 | IGHZ2  | Z       | 1,4, TM1                 | No        | -            | CZ2 & CZ3 missing (not in sequence)        |
| <i>Kryptolebias marmoratus</i> | NW_016094301.1                 | IGHM1  | M       | 1,2,3,4, TM1             | Yes       | -            |                                            |
| <i>Kryptolebias marmoratus</i> | NW_016094301.1                 | IGHD1  | D       | 1,2,3,4,5,6,7, TM1       | Yes       | -            |                                            |
| <i>Kryptolebias marmoratus</i> | NW_016094277.1                 | IGHM2  | M       | 1,2,3,4, TM1             | Yes       | -            |                                            |
| <i>Kryptolebias marmoratus</i> | NW_016094277.1                 | IGHD2  | D       | 1,2,3,4,5,6, TM1         | No        | -            | CD7 missing (not in sequence)              |
| <i>Poecilia reticulata</i>     | NC_024338.1                    | IGHZ1  | Z       | 1,2,3,4                  | No        | -            | TM1 missing (missing sequence)             |
| <i>Poecilia reticulata</i>     | NC_024338.1                    | IGHZ2  | Z       | 1,2,3,4, TM1             | Yes       | -            |                                            |
| <i>Poecilia reticulata</i>     | NC_024338.1                    | IGHM   | M       | 1,2,3,4, TM1             | Yes       | -            |                                            |
| <i>Poecilia reticulata</i>     | NC_024338.1                    | IGHD   | D       | 1,2,3,4,2,3,4,5,6,7, TM1 | Yes       | -            |                                            |
| <i>Poecilia formosa</i>        | NW_006800081.1                 | IGHZ1  | Z       | 1,2,3,4, TM1             | Yes       | -            |                                            |
| <i>Poecilia formosa</i>        | NW_006800081.1                 | IGHZ2  | Z       | 1,2,3,4, TM1             | Yes       | -            |                                            |
| <i>Poecilia formosa</i>        | NW_006800081.1                 | IGHZ3  | Z       | 1,2,3,4, TM1             | Yes       | -            |                                            |
| <i>Poecilia formosa</i>        | NW_006800081.1                 | IGHM   | M       | 1,2,3,4, TM1             | Yes       | -            |                                            |
| <i>Poecilia formosa</i>        | NW_006800081.1                 | IGHD   | D       | 1,2,3,4,5,6,7, TM1       | Yes       | -            |                                            |
| <i>Xiphophorus maculatus</i>   | NC_036458                      | IGHZ1  | Z       | 1,2,3,4, TM1             | Yes       | -            |                                            |
| <i>Xiphophorus maculatus</i>   | NC_036458                      | IGHZ2  | Z       | 1,2,3,4, TM1             | Yes       | -            |                                            |
| <i>Xiphophorus maculatus</i>   | NC_036458                      | IGHM   | M       | 1,2,3,4, TM1             | Yes       | -            |                                            |

<sup>1</sup> Excluding TM2 and secretory exons.

Table S23: *IGH* constant regions in cyprinodontiform fish, part 2

| Species                      | Scaffold(s)                    | Region | Isotype | Known Exons <sup>1</sup> | Complete? | Pseudo-exons | Comments                                        |
|------------------------------|--------------------------------|--------|---------|--------------------------|-----------|--------------|-------------------------------------------------|
| <i>Xiphophorus maculatus</i> | NC_036458                      | IGHD   | D       | 1,2,3,4,2,3,4,5,6,7,TM1  | Yes       | -            |                                                 |
| <i>Fundulus heteroclitus</i> | NW_012234561.1                 | IGHZ1  | Z       | 1,2,3,4,TM1              | Yes       | -            |                                                 |
| <i>Fundulus heteroclitus</i> | NW_012230737.1                 | IGHZ2  | Z       | 4,TM1                    | No        | -            | CZ1 to CZ3 missing (missing sequence)           |
| <i>Fundulus heteroclitus</i> | NW_012234542.1                 | IGHM   | M       | 1,2,3,4,TM1              | Yes       | -            |                                                 |
| <i>Fundulus heteroclitus</i> | NW_012234542.1                 | IGHD   | D       | 1,2,3,4,2,3,4,5,6,7,TM1  | Yes       | -            |                                                 |
| <i>Cyprinodon variegatus</i> | NW_015154250.1, NW_015151047.1 | IGHZ   | Z       | 1,2,3,4,TM1              | Yes       | -            |                                                 |
| <i>Cyprinodon variegatus</i> | NW_015151047.1                 | IGHM   | M       | 1,2,3,4,TM1              | Yes       | -            |                                                 |
| <i>Cyprinodon variegatus</i> | NW_015151047.1                 | IGHD   | D       | 1,2,3,4,2,3,4,5,6,7,TM1  | Yes       | -            |                                                 |
| <i>Oryzias latipes</i>       | NC_019866.2                    | IGHM1  | M       | 1,2,3,4,TM1              | Yes       | -            |                                                 |
| <i>Oryzias latipes</i>       | NC_019866.2                    | IGHD1  | D       | 1,2,3,4,6,7,TM1          | Yes       | 7            | Nonsense mutation in CD7                        |
| <i>Oryzias latipes</i>       | NC_019866.2                    | IGHM2  | M       | 1,2,3,4,TM1              | Yes       | -            |                                                 |
| <i>Oryzias latipes</i>       | NC_019866.2                    | IGHD2  | D       | 1,2,3,4,6,7,TM1          | Yes       | -            |                                                 |
| <i>Oryzias latipes</i>       | NC_019866.2                    | IGHM3  | M       | 1,2,3,4,TM1              | Yes       | -            |                                                 |
| <i>Oryzias latipes</i>       | NC_019866.2                    | IGHD3  | D       | 1,2,3,4,6,7,TM1          | Yes       | -            |                                                 |
| <i>Oryzias latipes</i>       | NC_019866.2                    | IGHM4  | M       | 1,2,3,4,TM1              | Yes       | -            |                                                 |
| <i>Oryzias latipes</i>       | NC_019866.2                    | IGHD4  | D       | 2,7,TM1                  | No        | -            | CD1 & CD3-6 missing (not in sequence)           |
| <i>Oryzias latipes</i>       | NC_019866.2                    | IGHM5  | M       | 1,2,3,4,TM1              | Yes       | -            |                                                 |
| <i>Oryzias latipes</i>       | NC_019866.2                    | IGHD5  | D       | 1,2,3,4,6,7,TM1          | Yes       | -            |                                                 |
| <i>Oryzias latipes</i>       | NC_019866.2                    | IGHM6  | M       | 1,2,3,4,TM1              | Yes       | -            |                                                 |
| <i>Oryzias latipes</i>       | NC_019866.2                    | IGHD6  | D       | 1,2,3,4,6,7,TM1          | Yes       | -            |                                                 |
| <i>Oryzias latipes</i>       | NC_019866.2                    | IGHD7  | D       | 1,2,3,6                  | No        | -            | CD4, CD5, CD7 and TM1 missing (not in sequence) |

<sup>1</sup> Excluding TM2 and secretory exons.

Table S24: *IGH* constant regions in cyprinodontiform fish, part 3
